# Supplementary material for: The genus Micromonospora as a model microorganism for bioactive natural product discovery
Source: Royal Society of Chemistry journal article supplement (doi:10.1039/d0ra04025h), 2020-01-01
Supplement: d0ra04025h1.pdf [file d0ra04025h1.pdf]

## **The genus *Micromonospora* as a model microorganism for bioactive natural products discovery**

Mohamed S. Hifnawy<sup>1</sup>, Mohamed M. Fouda<sup>2</sup>, Ahmed M. Sayed<sup>2</sup>, Rabab Mohammed<sup>3</sup>, Hossam M. Hassan<sup>3</sup>, Sameh F. AbouZid<sup>3</sup>, Mostafa E. Rateb<sup>3,4</sup>, Alexander Keller<sup>5</sup>, Martina Adamek<sup>6,7</sup>, Nadine Ziemert<sup>6,7,\*</sup>, and Usama Ramadan Abdelmohsen<sup>8,9\*</sup>.

<sup>1</sup>*Department of Pharmacognosy, Faculty of Pharmacy, Cairo University, Cairo, Egypt 11787*

<sup>2</sup>*Department of Pharmacognosy, Faculty of Pharmacy, Nahda University, Beni-Suef, Egypt 62513*

<sup>3</sup>*Department of Pharmacognosy, Faculty of Pharmacy, Beni-Suef University, Beni-Suef, Egypt 62514*

<sup>4</sup>*School of Computing, Engineering and Physical Sciences, University of the West of Scotland, Paisley PA1 2BE, UK*

<sup>5</sup>*Center for Computational and Theoretical Biology, Biocenter, University of Würzburg, Hubland Nord, 97074 Würzburg, Germany*

<sup>6</sup>*Interfaculty Institute of Microbiology and Infection Medicine Tübingen, University of Tübingen, Tübingen, Germany*

<sup>7</sup>*German Centre for Infection Research (DZIF), Partner Site Tübingen, Tübingen, Germany*

<sup>8</sup>*Department of Pharmacognosy, Faculty of Pharmacy, Minia University, 61519 Minia, Egypt*

<sup>9</sup>*Department of Pharmacognosy, Faculty of Pharmacy, Deraya University, Universities Zone, P.O. Box 61111 New Minia City, 61519 Minia*

\*Correspondence: [usama.ramadan@mu.edu.eg](mailto:usama.ramadan@mu.edu.eg) (URA);

[nadine.ziemert@uni-tuebingen.de](mailto:nadine.ziemert@uni-tuebingen.de) (NZ)

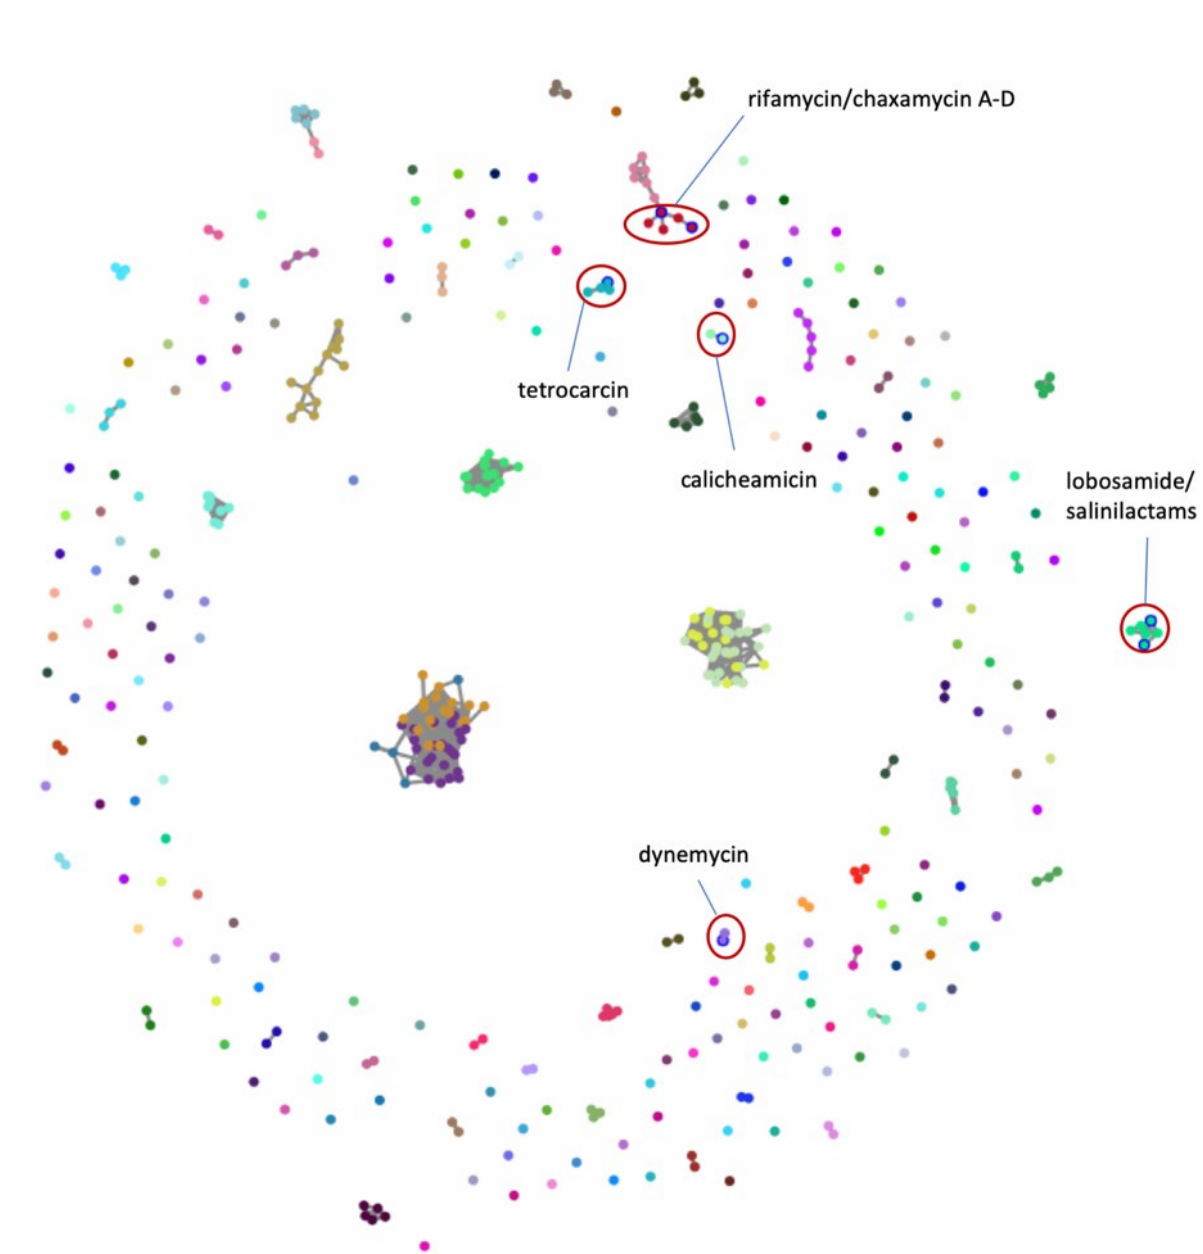

**Figure S1: *Micromonospora* - Biosynthetic Gene Cluster Similarity Networks of “Others” BGCs.**

Gene cluster similarity networks of PKS- BGCs generated with BiG-SCAPE from 87 *Micromonospora* genomes. Gene clusters were identified and classified using antiSMASH. Each node represents one sequenced gene cluster. Connected clusters likely encode for similar compounds. To identify already known and characterized BGCs, the dataset from the MIBiG database was added to the network analysis. MIBiG compounds are circled in red.

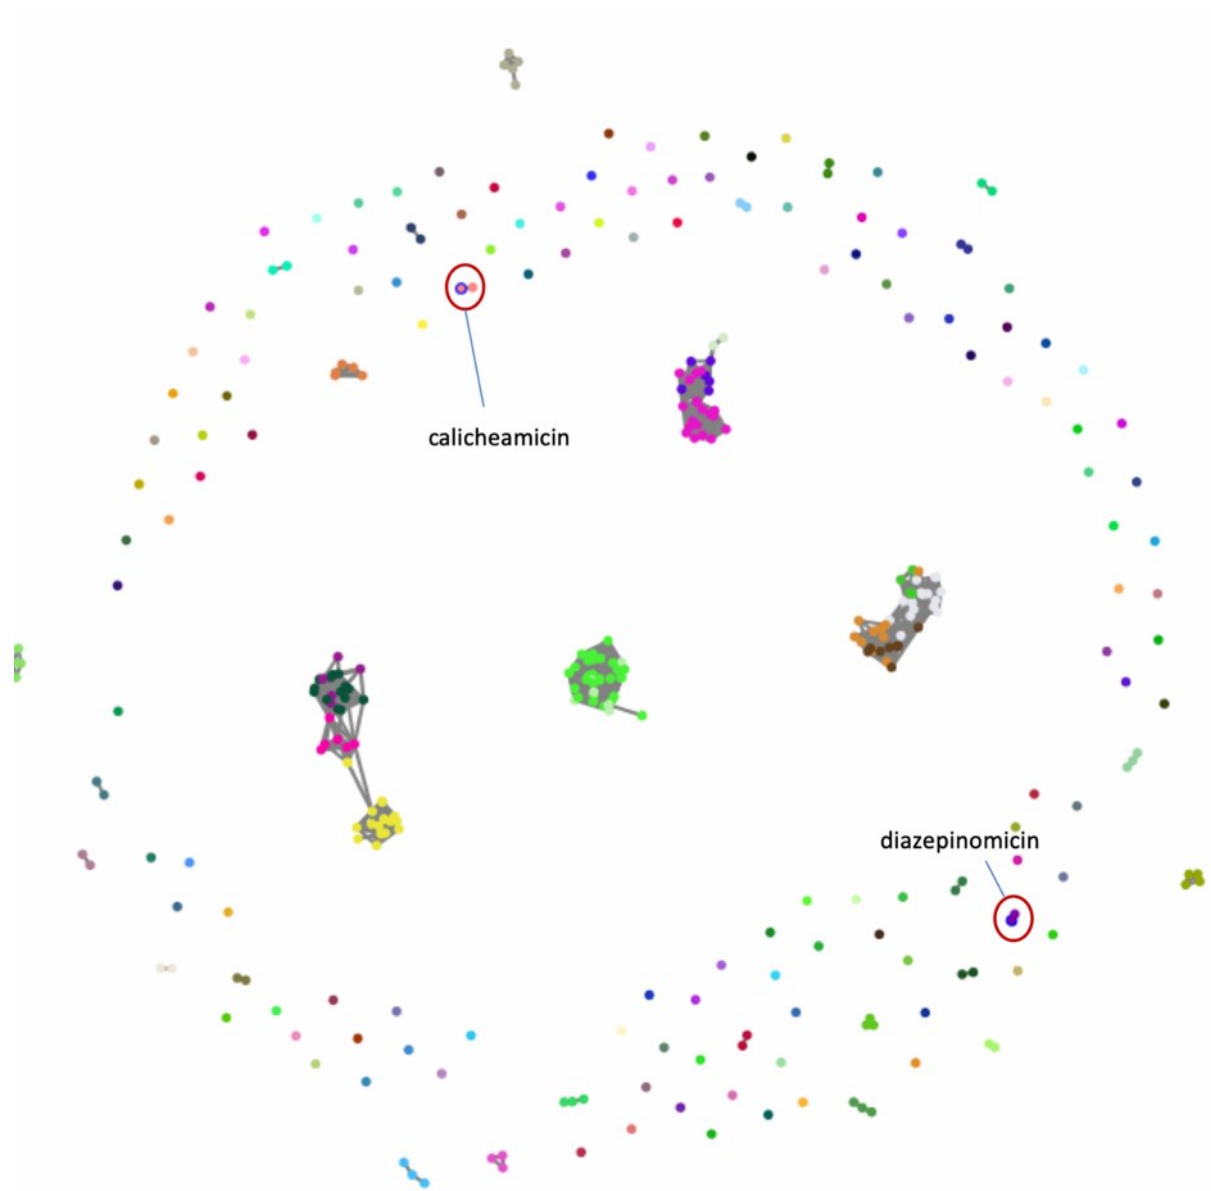

**Figure S2: *Micromonospora* - Biosynthetic Gene Cluster Similarity Networks of “PKS I” BGCs**

Gene cluster similarity networks of PKS- BGCs generated with BiG-SCAPE from 87 *Micromonospora* genomes. Gene clusters were identified and classified using antiSMASH. Each node represents one sequenced gene cluster. Connected clusters likely encode for similar compounds. To identify already known and characterized BGCs, the dataset from the MIBiG database was added to the network analysis. MIBiG compounds are circled in red.

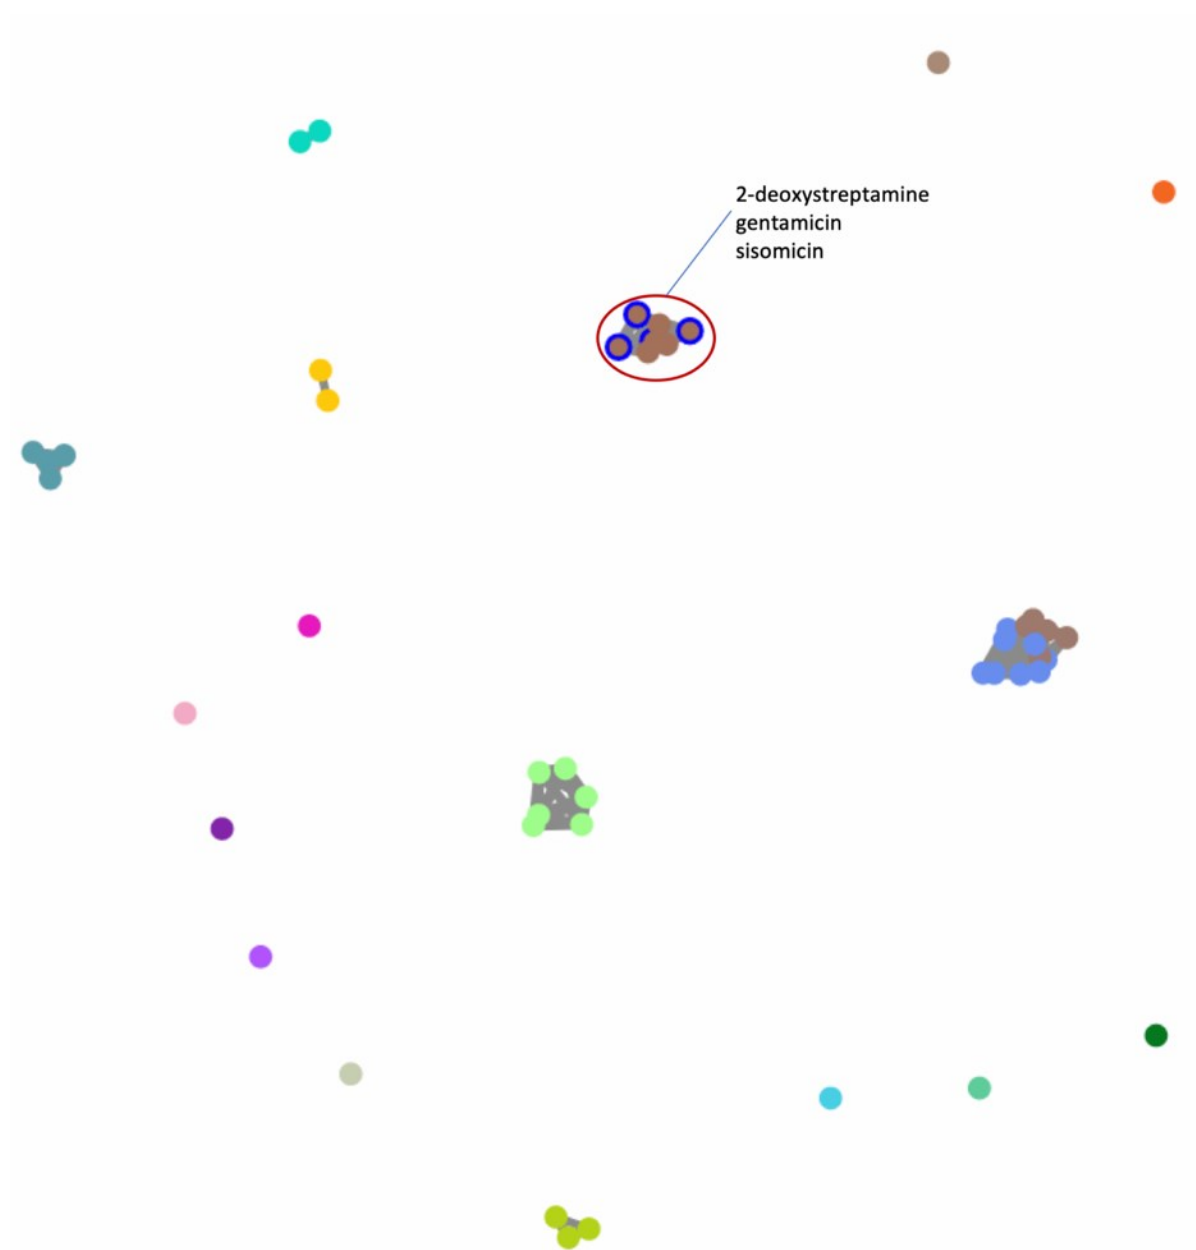

**Figure S3: *Micromonospora* - Biosynthetic Gene Cluster Similarity Networks of “Saccharides” BGCs**

Gene cluster similarity networks of PKS- BGCs generated with BiG-SCAPE from 87 *Micromonospora* genomes. Gene clusters were identified and classified using antiSMASH. Each node represents one sequenced gene cluster. Connected clusters likely encode for similar compounds. To identify already known and characterized BGCs, the dataset from the MIBiG database was added to the network analysis. MIBiG compounds are circled in red.

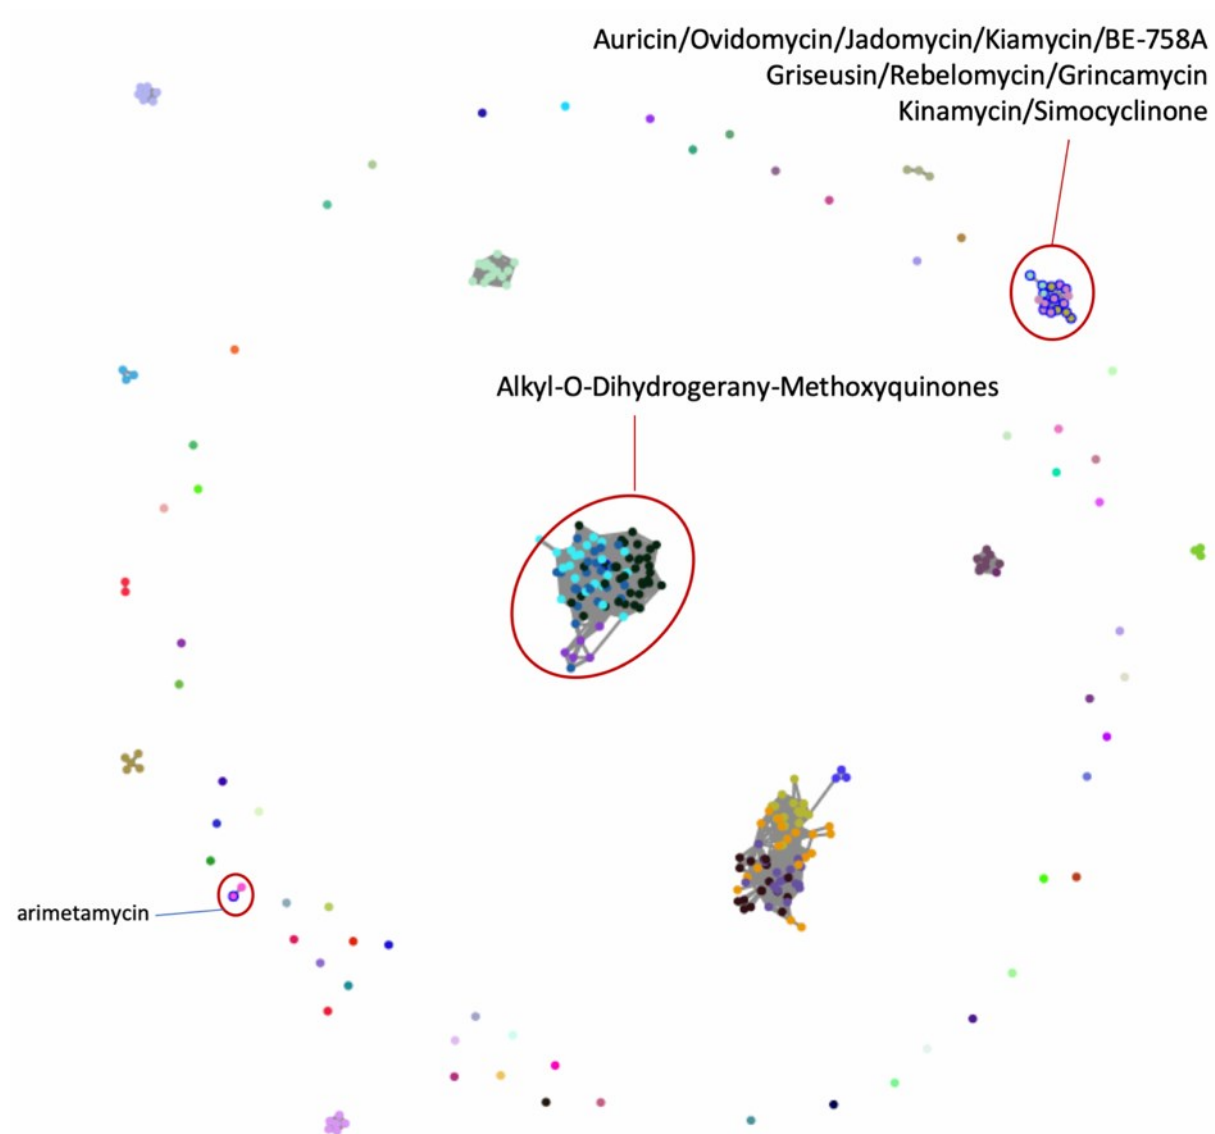

**Figure S4: *Micromonospora* - Biosynthetic Gene Cluster Similarity Networks of “other polyketides” BGCs**

Gene cluster similarity networks of PKS- BGCs generated with BiG-SCAPE from 87 *Micromonospora* genomes. Gene clusters were identified and classified using antiSMASH. Each node represents one sequenced gene cluster. Connected clusters likely encode for similar compounds. To identify already known and characterized BGCs, the dataset from the MIBiG database was added to the network analysis. MIBiG compounds are circled in red.

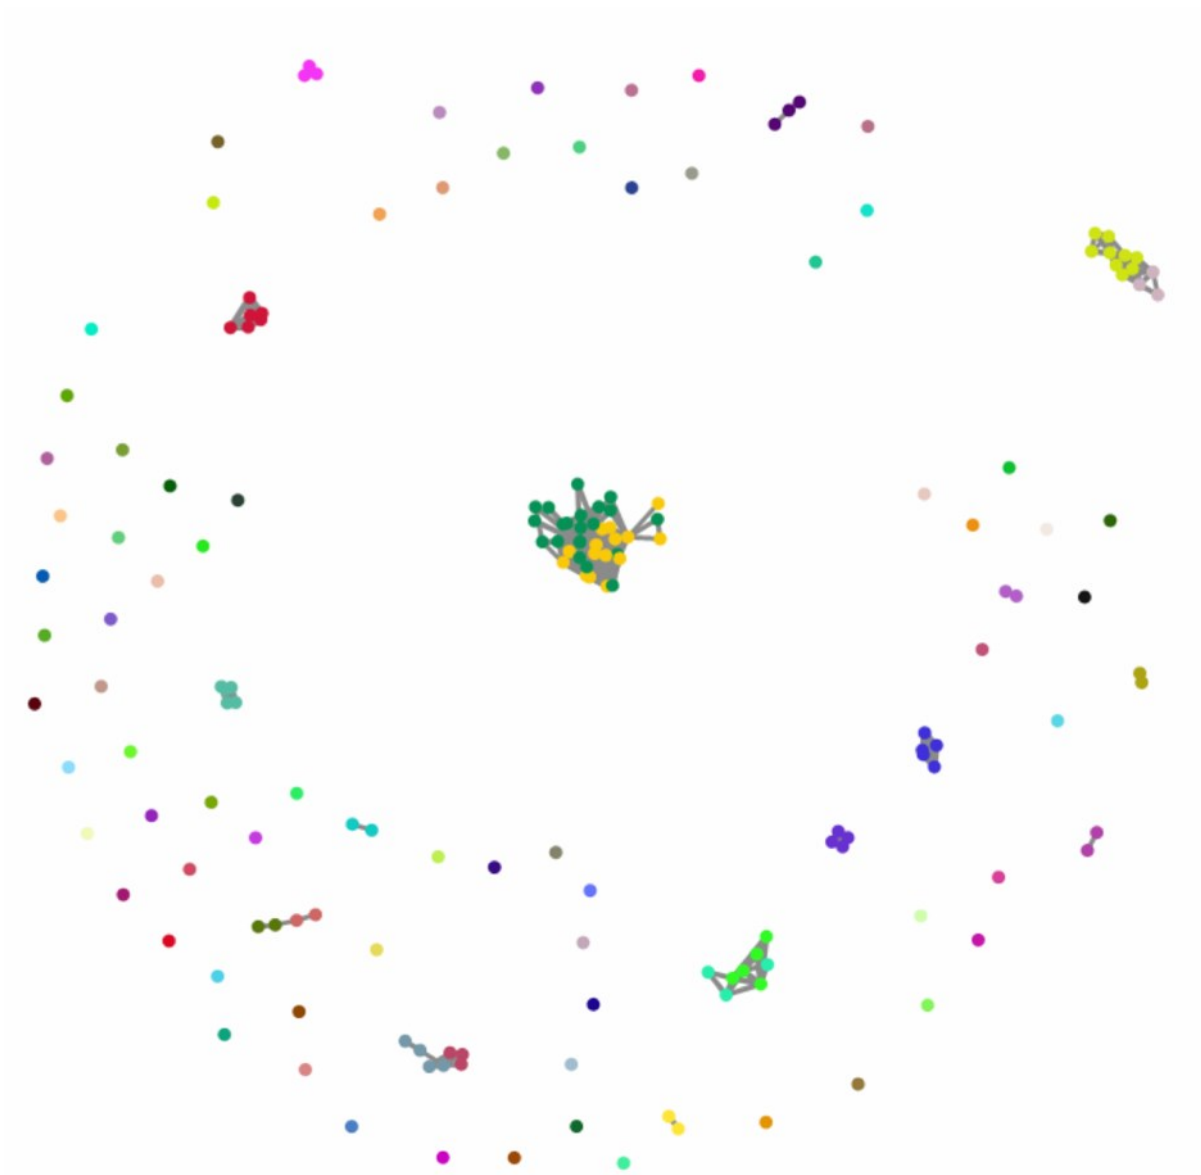

**Figure S5: *Micromonospora* - Biosynthetic Gene Cluster Similarity Networks of “PKS-NRPS Hybrids” BGCs**

Gene cluster similarity networks of PKS- BGCs generated with BiG-SCAPE from 87 *Micromonospora* genomes. Gene clusters were identified and classified using antiSMASH. Each node represents one sequenced gene cluster. Connected clusters likely encode for similar compounds. To identify already known and characterized BGCs, the dataset from the MIBiG database was added to the network analysis. MIBiG compounds are circled in red.

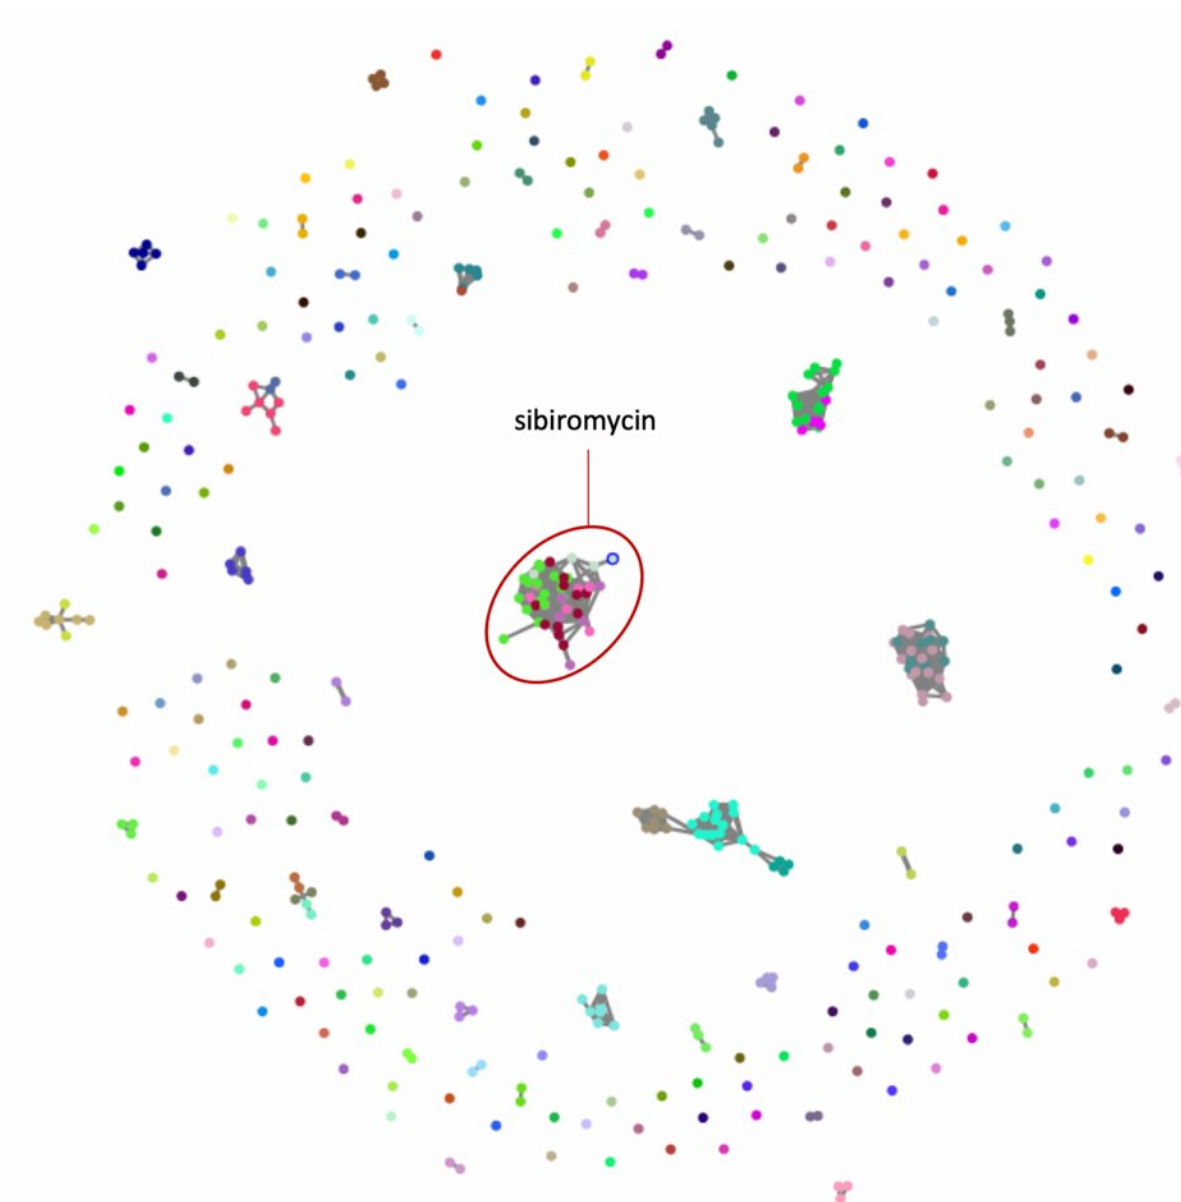

**Figure S6: *Micromonospora* - Biosynthetic Gene Cluster Similarity Networks of “NRPS” BGCs**

Gene cluster similarity networks of PKS- BGCs generated with BiG-SCAPE from 87 *Micromonospora* genomes. Gene clusters were identified and classified using antiSMASH. Each node represents one sequenced gene cluster. Connected clusters likely encode for similar compounds. To identify already known and characterized BGCs, the dataset from the MIBiG database was added to the network analysis. MIBiG compounds are circled in red.

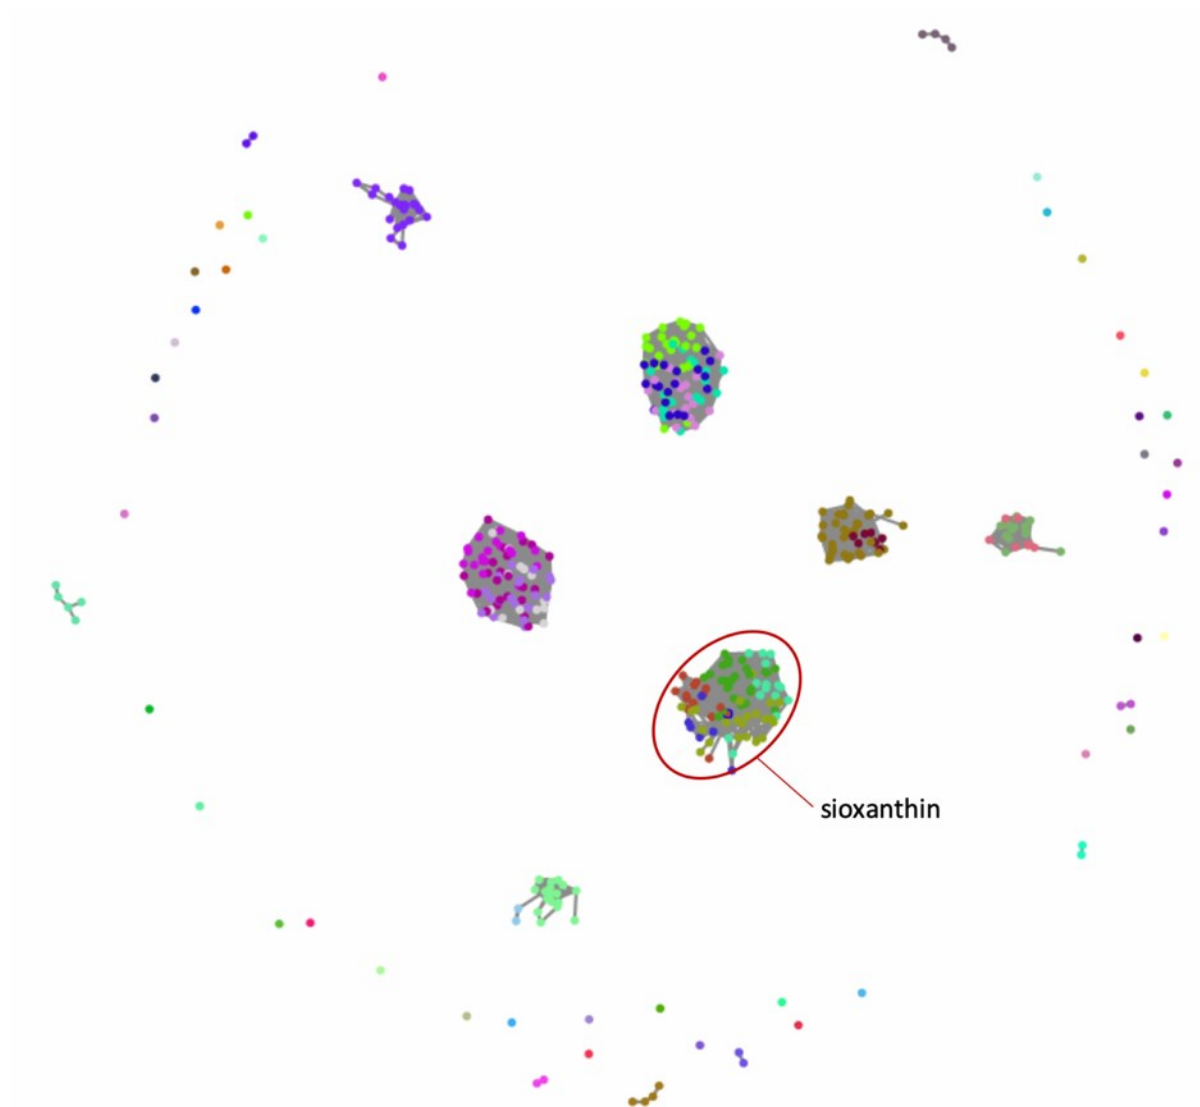

**Figure S7: *Micromonospora* - Biosynthetic Gene Cluster Similarity Networks of “Terpene” BGCs**

Gene cluster similarity networks of PKS- BGCs generated with BiG-SCAPE from 87 *Micromonospora* genomes. Gene clusters were identified and classified using antiSMASH. Each node represents one sequenced gene cluster. Connected clusters likely encode for similar compounds. To identify already known and characterized BGCs, the dataset from the MIBiG database was added to the network analysis. MIBiG compounds are circled in red.



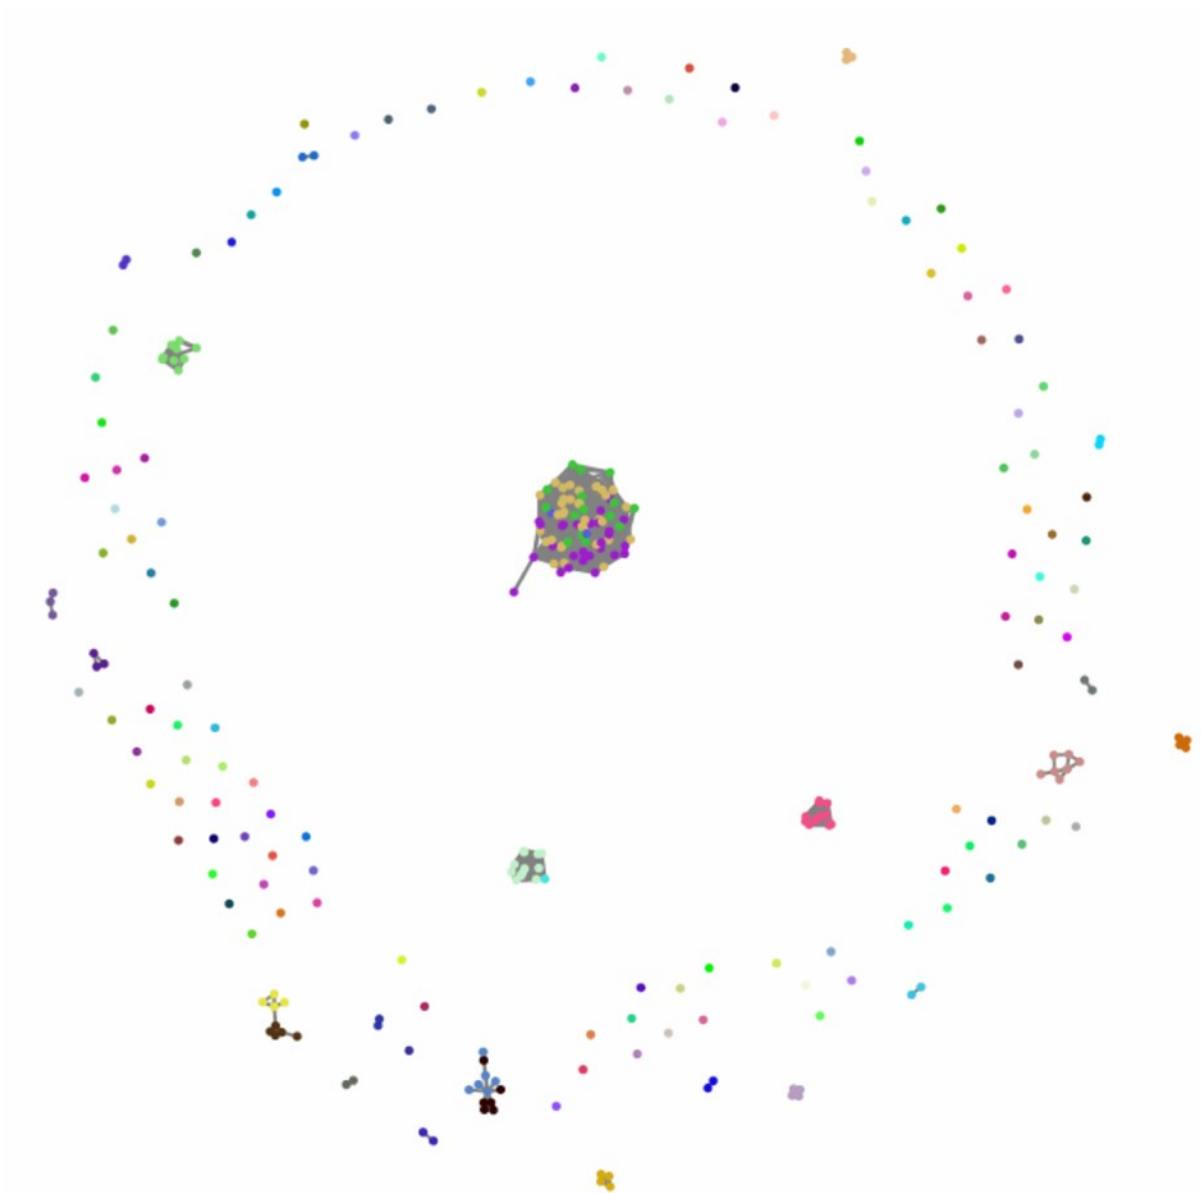

**Figure S8: *Micromonospora* - Biosynthetic Gene Cluster Similarity Networks of “RiPPs” BGCs**

Gene cluster similarity networks of PKS- BGCs generated with BiG-SCAPE from 87 *Micromonospora* genomes. Gene clusters were identified and classified using antiSMASH. Each node represents one sequenced gene cluster. Connected clusters likely encode for similar compounds. To identify already known and characterized BGCs, the dataset from the MIBiG database was added to the network analysis. MIBiG compounds are circled in red.

**Table S1. Natural products derived from *Micromonospora***

| <b>Compounds</b>             | <b>Class</b>   | <b>Microbe</b>                                                               | <b>Source</b> | <b>Year</b> | <b>Activity</b>                                                                                      | <b>references</b>            |
|------------------------------|----------------|------------------------------------------------------------------------------|---------------|-------------|------------------------------------------------------------------------------------------------------|------------------------------|
| Paromamine(1)                | Aminoglycoside | Minor component of the gentamicin complex prod. by <i>Micromonospora spp</i> | Soil          | 1959        | Weakly active against Gram-positive bacteria<br>Important intermed. for semisynthetic aminoglycoside | <sup>1</sup>                 |
| Gentamicins (2)              | Aminoglycoside | <i>M. echinospora</i> NRRL 2953<br><i>M. echinospora</i> NRRL 2985           | Soil          | 1963        | Antibacterial                                                                                        | <sup>2</sup>                 |
| Antibiotic 460 (3)           | Aminoglycoside | <i>M. chalcea</i> subsp. <i>flavida</i><br>NRRL 3222                         | Soil          | 1969        | Antibacterial<br>MIC (2.5- 7.5 µg/ml) Gram positive bacteria                                         | <sup>3</sup>                 |
| 6640 (sisomicin) (4)         | Aminoglycoside | <i>M. inyoensis</i> NRRL 3292.                                               | Soil          | 1970        | Antibacterial activity.<br>MIC values ranged from (0.01-7.5 µg/ml).                                  | <sup>4</sup>                 |
| Gentamine C <sub>1</sub> (5) | Aminoglycoside | <i>M. purpurea-nigrescens</i>                                                | Soil          | 1971        | Active mainly against Gram-positive bacteria                                                         | <sup>5</sup>                 |
| Neomycin B (6)               | Aminoglycoside | <i>M. chalcea</i> 69-683                                                     | -----         | 1971        | Antibacterial activity                                                                               | <sup>6</sup>                 |
| Antibiotic G-418 (7)         | Aminoglycoside | <i>M. echinospora</i> NRRL 5326                                              | Soil          | 1974        | Antibacterial with MIC values (16-64µg/ml).<br>Antiparasitic activity                                | <sup>7</sup><br><sup>8</sup> |

|                                                                 |                |                                                                                                       |      |      |                                                                                                                                                                 |    |
|-----------------------------------------------------------------|----------------|-------------------------------------------------------------------------------------------------------|------|------|-----------------------------------------------------------------------------------------------------------------------------------------------------------------|----|
| Mutamycins<br>(8)                                               | Aminoglycoside | <i>M. inyoensis</i> NRRL<br>3292                                                                      | Soil | 1974 | Antibacterial<br>activity MIC<br>(0.08-3µg/ml).                                                                                                                 | 9  |
| Sagamicin (9)<br>(XK-62-2)                                      | Aminoglycoside | <i>M. sagamiensis</i><br>subsp.<br>nonreducans ATCC<br>21803.<br><i>M. sagamiensis</i><br>ATCC 21826. | Soil | 1974 | Antibacterial<br>activity MIC<br>(0.001-8.3 µg/ml)                                                                                                              | 10 |
| Verdamycin<br>(10)                                              | Aminoglycoside | <i>M. grisea</i> NRRL<br>3800                                                                         | Soil | 1974 | Antibacterial<br>activity.<br>MIC (0.5-8 µg/ml)                                                                                                                 | 11 |
| Gentamicin <sub>2b</sub><br>(11)                                | Aminoglycoside | <i>M. sagamiensis</i>                                                                                 | Soil | 1975 | Antibacterial<br>less ototoxic and<br>nephrotoxic than<br>Gentamicin C<br>complex                                                                               | 12 |
| Antibiotic G-52<br>(12)                                         | Aminoglycoside | <i>M. zionensis</i> NRRL<br>5466                                                                      | Soil | 1976 | Antibacterial<br>activity for gram<br>positive and gram<br>negative bacteria<br>with IC <sub>50</sub> ( 0.01-<br>17.5µg/ml and<br>0.03-7.5µg/ml<br>respectively | 13 |
| Antibiotic 66-40B<br>Sisomicin B<br>(13)                        | Aminoglycoside | Minor prod. from<br><i>M. inyoensis</i>                                                               | Soil | 1976 | Antibacterial                                                                                                                                                   | 14 |
| Antibiotic 66-40D<br>Sisomicin D (14)                           | Aminoglycoside | Minor prod. from<br><i>M. inyoensis</i>                                                               | Soil | 1976 | Antibacterial                                                                                                                                                   | 14 |
| Destomycin B<br>C <sub>21</sub> HC <sub>21</sub> H <sub>3</sub> | Aminoglycoside | <i>M. cyaneogranulata</i>                                                                             | Soil | 1976 | Antibacterial                                                                                                                                                   | 15 |

|                                                       |                                                              |                                                                                                                                   |                   |                  |                                                                                                                                             |    |  |
|-------------------------------------------------------|--------------------------------------------------------------|-----------------------------------------------------------------------------------------------------------------------------------|-------------------|------------------|---------------------------------------------------------------------------------------------------------------------------------------------|----|--|
| (15)                                                  | $^{39}\text{N}_3 \text{N}_3\text{O}_{13}$<br>$\text{O}_{13}$ |                                                                                                                                   |                   |                  |                                                                                                                                             |    |  |
| Gentamicin A (16)                                     | Aminoglycoside                                               | <i>Micromonospora</i><br><i>spp</i>                                                                                               | Soil              | 1976             | Antibacterial                                                                                                                               | 2  |  |
| Gentamicin B,B1<br>(17,18)                            | Aminoglycoside                                               | <i>Micromonospora</i><br><i>spp</i>                                                                                               | Soil              | 1976             | Antibacterial                                                                                                                               | 8  |  |
| Gentamicin C <sub>1</sub> ,C <sub>1a</sub><br>(19,20) | Aminoglycoside                                               | <i>M. purpurea</i> ,<br><i>M. echinospora</i> ,<br><i>M. sagamiensis</i> ,<br><i>M. scabimana</i> ,<br><i>M. longisporoflavus</i> | Soil              | 1976             | Antibacterial                                                                                                                               | 12 |  |
| Gentamicin C <sub>2a</sub><br>(21)                    | Aminoglycoside                                               | <i>M. purpurea</i> and <i>M.</i><br><i>sagamiensis</i>                                                                            | Soil              | 1976             | NA                                                                                                                                          | 8  |  |
| Gentamicin X <sub>2</sub><br>(22)                     | Aminoglycoside                                               | <i>M. purpurea</i> and <i>M.</i><br><i>echinospor</i>                                                                             | Soil              | 1976             | NA                                                                                                                                          | 8  |  |
| Gentoximicin B<br>(23)                                | Aminoglycoside                                               | <i>M. purpurea</i>                                                                                                                | Soil              | 1976             | NA                                                                                                                                          | 8  |  |
| Fortimicins<br>A and B<br>(24,25)                     | Aminoglycoside                                               | <i>M. olivoasterospora</i><br>ATCC 21819.<br><br><i>Micromonospora</i><br><i>species</i> MK-70                                    | Soil.<br><br>Soil | 1976<br><br>1977 | Antibacterial<br>against gram<br>positive with with<br>MIC (0.2-<br>10µg/ml). and<br>negative bacteria<br>(0.08-5µg/ml)for<br>fortimicin A. | 16 |  |
| Antibiotic II<br>(26)                                 | Aminoglycoside                                               | <i>M.purpurea</i>                                                                                                                 | Soil              | 1977             | Antibacterial                                                                                                                               | 5  |  |
| Antibiotic 66-40C<br>(27)                             | Dimeric<br>aminoglycoside<br>antibiotic                      | <i>M.inyoensis</i>                                                                                                                | Soil              | 1977             | NA                                                                                                                                          | 17 |  |
| Antibiotic Y 02077Hδ<br>3"-N-                         | Aminoglycoside                                               | <i>M. purpurea</i> and<br><i>Micromonospora</i>                                                                                   | Soil              | 1977             | NA                                                                                                                                          | 5  |  |

|                                                                                            |                              |                                                                  |      |      |                                                              |                    |
|--------------------------------------------------------------------------------------------|------------------------------|------------------------------------------------------------------|------|------|--------------------------------------------------------------|--------------------|
| Demethylgentamicin C <sub>2</sub><br>(28)                                                  |                              | <i>sp. Y-02077H</i>                                              |      |      |                                                              |                    |
| Garamine (29)                                                                              | Aminoglycoside               | <i>Micromonospora</i><br>cultures.<br>Component of<br>Sisomicin. | Soil | 1977 | NA                                                           | 5                  |
| Gentamicin A <sub>1</sub> ,A <sub>2</sub> ,A <sub>3</sub> ,A <sub>4</sub><br>(30,31,32,33) | Aminoglycoside               | <i>M. purpurea</i> and <i>M. echinospora</i>                     | Soil | 1977 | -----                                                        | 5                  |
| Gentamine C <sub>1</sub><br>(34)                                                           | Aminoglycoside               | <i>M.purpurea-nigrescens</i>                                     | Soil | 1977 | Antibacterial<br>Active against<br>Gram-positive<br>bacteria | 5                  |
| Gentamine C <sub>1a</sub><br>(35)                                                          | Aminoglycoside               | <i>M. purpurea-nigrescens.</i>                                   | Soil | 1977 | Antibacterial<br>Active against<br>gram positive<br>bacteria | 5                  |
| Gentamine C <sub>2</sub><br>(36)                                                           | Aminoglycoside               | <i>M.purpurea-nigrescens.</i>                                    | Soil | 1977 | Antibacterial<br>Active against<br>Gram-positive<br>bacteria | 5                  |
| 4"-Demethylgentamicin C<br>(37)                                                            | Aminoglycoside               | <i>M. purpurea-nigrescens</i>                                    | Soil | 1977 | Antibacterial                                                | 5                  |
| 4"-Demethylgentamicin<br>C <sub>2</sub><br>(38)                                            | Aminoglycoside               | <i>M. purpurea-nigrescens</i>                                    | Soil | 1977 | Antibacterial                                                | 5                  |
| 4" Demethylgentamicin<br>C <sub>1a</sub> (39)                                              | Aminoglycoside<br>antibiotic | <i>M. purpurea-nigrescens.</i>                                   | Soil | 1977 | Antibacterial                                                | 5                  |
| 6'-Methylgentamicin A<br>(40)                                                              | Aminoglycoside               | <i>M. purpurea-nigrescens</i>                                    | Soil | 1977 | Antibacterial                                                | 5                  |
| 6'-Methylgentamicin A <sub>1</sub><br>(41)                                                 | Aminoglycoside               | <i>M. purpurea-nigrescens</i>                                    | Soil | 1977 | Antibacterial                                                | 5                  |
| Antibiotic XK 62-4                                                                         | Aminoglycoside               | <i>M. sagamiensis</i>                                            | Soil | 1978 | Antibacterial                                                | Ger. Pat., 1978, 2 |

|                                             |                |                                         |      |      |                                                              |         |
|---------------------------------------------|----------------|-----------------------------------------|------|------|--------------------------------------------------------------|---------|
| (42)                                        |                |                                         |      |      |                                                              | 821 948 |
| 3"-N-Demethylsisomicin<br>Antibiotic 66-40G | Aminoglycoside | <i>M. inyoensis and M. sagamiensis.</i> | Soil | 1978 | Antibacterial                                                | 18      |
| (43)                                        |                |                                         |      |      |                                                              |         |
| Fortimicin D (44)                           | Aminoglycoside | <i>M. olivoasterospora</i>              | Soil | 1979 | Antibacterial                                                | 19      |
| Fortimicin KE                               | Aminoglycoside | <i>M. olivoasterospora</i>              | Soil | 1979 | Weak antibacterial                                           | 19      |
| (45)                                        |                |                                         |      |      |                                                              |         |
| Antibiotic X 14847(46)                      | Aminoglycoside | <i>M. echinospora</i>                   | Soil | 1980 | Antibacterial<br>Active against<br>gram positive<br>bacteria | 20      |
| Fortimicin E (47)                           | Aminoglycoside | <i>M. olivoasterospora</i>              | Soil | 1980 | Weak antibacterial                                           | 21      |
| Fortimicin KO <sub>1</sub>                  | Aminoglycoside | <i>M. olivoasterospora</i>              | Soil | 1980 | Antibacterial                                                | 22      |
| Fortimicin AE                               |                |                                         |      |      |                                                              |         |
| (48-49)                                     |                |                                         |      |      |                                                              |         |
| Fortimicin AP(50)                           | Aminoglycoside | <i>M. olivoasterospora</i>              | Soil | 1980 | Antibacterial                                                | 23      |
| Fortimicin AM(51)                           |                |                                         |      |      |                                                              |         |
| Fortimicin AH                               | Aminoglycoside | <i>M. olivoasterospora</i>              | Soil | 1980 | Antibacterial                                                | 24      |
| Fortimicin AI                               |                |                                         |      |      |                                                              |         |
| (52,53)                                     |                |                                         |      |      |                                                              |         |
| Fortimicin AK (54)                          | Aminoglycoside | <i>M. olivoasterospora</i>              | Soil | 1980 | NA                                                           | 24      |
| Fortimicin AO (55)                          | Aminoglycoside | <i>M. olivoasterospora</i>              | Soil | 1980 | NA                                                           | 24      |
| O-Demethylfortimicin A                      | Aminoglycoside | <i>M. olivoasterospora</i>              | Soil | 1980 | NA                                                           | 25      |
| (56)                                        |                |                                         |      |      |                                                              |         |
| 2'N-Glycylfortimicin KE                     | Aminoglycoside | <i>M. olivoasterospora</i>              | soil | 1981 | NA                                                           | 26      |
| (57)                                        |                |                                         |      |      |                                                              |         |
| Antibiotic<br>SU1,SU2,SU3,SU4               | Aminoglycoside | <i>M. sagamiensis</i>                   | Soil | 1982 | antibacterial<br>against gentamicin<br>resistant strains     | 27      |
| (58-61)                                     |                |                                         |      |      |                                                              |         |
| 2-Hydroxysagamicin                          | Aminoglycoside | <i>M. sagamiensis and M. purpurea</i>   | Soil | 1982 | Antibacterial                                                | 28      |
| (62)                                        |                |                                         |      |      |                                                              |         |
| 6'-N-Methylverdamicin                       | Aminoglycoside | Prod. from<br>Verdamicin by a           | Soil | 1982 | Antibacterial                                                | 29      |
| (63)                                        |                |                                         |      |      |                                                              |         |

|                                                |                                                               |                                                                   |        |      |                                                                                                           |                             |
|------------------------------------------------|---------------------------------------------------------------|-------------------------------------------------------------------|--------|------|-----------------------------------------------------------------------------------------------------------|-----------------------------|
|                                                |                                                               | strain of <i>M. inyoensis</i> and <i>M. zionensis</i><br>NRRL5466 |        |      |                                                                                                           |                             |
| 5-Deoxygentamicin C <sub>2b</sub><br>(64)      | Aminoglycoside                                                | <i>M. purpurea</i>                                                | Soil   | 1983 | Antibacterial                                                                                             | US Pat., 1983, 4<br>412 068 |
| Antibiotic FU 10<br>(65)                       | Aminoglycoside                                                | <i>M. olivoasterospora</i>                                        | Soil   | 1984 | Weak antibacterial                                                                                        | 30                          |
| Fortimicin KK<br>(66)                          | Aminoglycoside                                                | Micromonospora<br><i>olivoasterospora</i>                         | Soil   | 1984 | Antibacterial                                                                                             | 31                          |
| Fortimicin KL1<br>(67)                         | Aminoglycoside                                                | Micromonospora<br><i>olivoasterospora</i>                         | Soil   | 1984 | Antibacterial                                                                                             | 31                          |
| Vertilmicin<br>(68)                            | Aminoglycoside                                                | Semisynthetic, prod.<br>by <i>Micromonospora</i><br><i>sp</i>     | Soil   | 1987 | Antibacterial                                                                                             | 32                          |
| Calicheamicins<br>(69)                         | Aminoglycosidic<br>antibiotic complex.<br>Enediyne antibiotic | <i>M.echinospora ssp.</i><br><i>calichensis</i> NRRL<br>15839     | Soil   | 1989 | Antineoplastic<br>agent                                                                                   | 33                          |
| Antibiotic Sch 58777<br>Orthosomycin J<br>(70) | Aminoglycoside                                                | <i>M. carbonacea var.</i><br><i>africana</i>                      | Soil   | 1997 | Antibacterial<br>against<br><i>Staphylococcus</i><br><i>aureus</i>                                        | 34                          |
| Fortimicin KR1<br>(71)                         | Aminoglycoside                                                | <i>Micromonospora</i><br><i>olivoasterospora</i>                  | Sponge | 2010 | Antibacterial                                                                                             | 35                          |
| Primycin, Debrycin.<br>Ebrimycin<br>(72-74)    | Macrolide complex                                             | <i>M. galeriensis</i>                                             | Soil   | 1954 | Potent ionophore.<br>Active against<br>Gram-positive<br>bacteria and<br>mycobacteria.<br>Antifungal agent | 36                          |

|                                                                                                           |            |                                                                                                                   |      |      |                                                                                                                                                                                                                        |          |
|-----------------------------------------------------------------------------------------------------------|------------|-------------------------------------------------------------------------------------------------------------------|------|------|------------------------------------------------------------------------------------------------------------------------------------------------------------------------------------------------------------------------|----------|
| Megalomicins<br>A <sub>1</sub> ,B,C <sub>1</sub> ,C <sub>2</sub><br>(75-78)                               | Macrolides | <i>M. megalomicea</i><br>subsp.<br>megalomicea NRRL<br>3274<br><i>M. megalomicea</i><br>subsp. nigra<br>NRRL 3275 | Soil | 1969 | Antibacterial<br>MIC<br>A (0.075 -1.2<br>µg/ml)<br>B ((0.005-5 µg/m).<br>C1 (0.003-<br>1.2µg/ml).<br>C2 ((0.0005-0.6<br>µg/ml).<br>Antiviral C1<br>Antiparasite (IC <sub>50</sub><br>0.2, 1, 2, 3, and 8<br>µg/mL) A1. | 37       |
| Rosamicin<br>(79)                                                                                         | Macrolide  | <i>M. rosaria</i>                                                                                                 | Soil | 1972 | Antibacterial<br>Gram positive with<br>MIC 0.03-3 µg/ml<br>and Gram negative<br>bacteria with MIC<br>ranged from (0. 3-<br>7.5 µg/ml).                                                                                 | 38       |
| Antibiotic XK 41B2<br>(80)                                                                                | Macrolide  | <i>M. inositola</i>                                                                                               | Soil | 1974 | NA                                                                                                                                                                                                                     | 39       |
| Juvenimicins<br>A <sub>2</sub> ,A <sub>3</sub> ,A <sub>4</sub> ,B <sub>1</sub> ,B <sub>3</sub><br>(81-85) | Macrolides | <i>M. chalcea</i> var.<br><i>izumensis</i>                                                                        | Soil | 1976 | Antibacterial<br>Gram +ve MIC<br>(0.01- 100µg/ml)<br>Gram -ve MIC (5-<br>>100 µg/ml)                                                                                                                                   | 40<br>41 |
| Antibiotic M 4365G1<br>(86)                                                                               | Macrolide  | <i>M. capillata</i>                                                                                               | Soil | 1977 | Antibacterial<br>Active against<br>gram positive<br>bacteria                                                                                                                                                           | 42       |



|                                           |           |                                                  |      |      |                                                                                                                           |    |
|-------------------------------------------|-----------|--------------------------------------------------|------|------|---------------------------------------------------------------------------------------------------------------------------|----|
| Repromicin<br>Antibiotic M 4365G2<br>(87) | Macrolide | <i>M. capillata and M. rosari</i>                | Soil | 1978 | Antibacterial<br>Active against<br>gram positive<br>bacteria                                                              | 43 |
| Antlermicin B<br>Antlermicin C<br>(88,89) | Macrolide | <i>M. chalcea-<br/>kazunoensis</i> sp. T-<br>90. | Soil | 1980 | Antibacterial<br>Antitumor                                                                                                | 44 |
| Mycinamycin<br>I,II,III,IV,V<br>(90-94)   | Macrolide | <i>M. grisseorubida<br/>A11725</i>               | Soil | 1980 | Active against<br>gram positive<br>bacteria,<br>Haemophilus<br>influenzae and<br>mycoplasmas<br>(MIC 0.1 – 3.12<br>µg/mL) | 45 |
| Protylonolide<br>(95)                     | Macrolide | <i>M. rosaria</i>                                | Soil | 1980 | Biosynth.<br>precursor to<br>Tylonolide.                                                                                  | 46 |
| 20-Deoxorosaranolide<br>(96)              | Macrolide | <i>M. rosaria</i>                                | Soil | 1982 | Prob. intermed. in<br>biosynth. of<br>Rosamicin                                                                           | 47 |
| Lipiarmycin A <sub>3</sub><br>(97)        | Macrolide | <i>M. echinospora<br/>ssp. armeniaca</i>         | Soil | 1983 | Antibacterial                                                                                                             | 48 |
| 23-Hydroxyprotylonolide<br>(98)           | Macrolide | <i>Micromonospora<br/>sp. YS-02930K</i>          | Soil | 1983 | NA                                                                                                                        | 49 |
| 19,23-<br>Dihydroxyprotylonolide<br>(99)  | Macrolide | <i>Micromonospora<br/>sp. YS-02930K</i>          | Soil | 1983 | NA                                                                                                                        | 49 |
| Neorustmicin A<br>(100)                   | Macrolide | <i>M. chalcea</i> 1302-<br>AV                    | Soil | 1985 | Antifungal , MIC<br>(0.2-0.4µg/ml).                                                                                       | 50 |

|                                                                                                                         |           |                                                                 |      |      |                                                                                                                |    |
|-------------------------------------------------------------------------------------------------------------------------|-----------|-----------------------------------------------------------------|------|------|----------------------------------------------------------------------------------------------------------------|----|
| Rustmicin<br>(101)                                                                                                      | Macrolide | <i>M. narashinoensis</i><br>980-MC.                             | Soil | 1985 | Antifungal<br>MIC (0.8-1µg/ml).                                                                                | 50 |
| Galbonolide A<br>(102)                                                                                                  | Macrolide | <i>M.narasinhoensis</i><br>and <i>M. chalcea</i>                | Soil | 1985 | Antifungal                                                                                                     | 51 |
| Clostomicins A, B <sub>1</sub> , B <sub>2</sub> ,<br>C, D<br>(103-107)                                                  | Macrolide | <i>M. echinospora</i><br>subsp.<br><i>armeniaca</i> KMR-<br>593 | Soil | 1986 | Antibacterial<br>Diameter of<br>inhibition zone<br>(mm)<br>(10.2 – 36.8).                                      | 52 |
| Neorustmicin B,C,D<br>(108-110)                                                                                         | Macrolide | <i>M. chalcea</i> 1302-<br>AV                                   | Soil | 1986 | Antifungal<br>Neorustmicin B<br>1.0 µg/ml While,<br>neorustmicins C<br>and D 4 and 5<br>µg/ml,<br>respectively | 53 |
| Lipiarmycin B <sub>3</sub><br>(111)                                                                                     | Macrolide | <i>M. echinospora</i>                                           | Soil | 1988 | Antibacterial<br>Active against<br>gram positive<br>bacteria                                                   | 54 |
| Izenamicin B2<br>(Glycoside , aglycon)<br>A <sub>1</sub> -A <sub>4</sub><br>B <sub>1</sub> -B <sub>4</sub><br>(112-115) | Macrolide | <i>Micromonos</i><br><i>pora sp</i><br>S-02930K.                | Soil | 1989 | Antibacterial                                                                                                  | 55 |

|                                                                                      |                                                |                                                            |      |      |                                                                                                                    |    |
|--------------------------------------------------------------------------------------|------------------------------------------------|------------------------------------------------------------|------|------|--------------------------------------------------------------------------------------------------------------------|----|
| Antibiotic 6108A <sub>1</sub><br>(116)                                               | Macrolide                                      | <i>M. fastidiosus</i>                                      | Soil | 1990 | Antibacterial                                                                                                      | 56 |
| Antibiotic 6108 A <sub>1</sub> , B<br>(117,118)                                      | Macrolide                                      | Micromonospora<br>strain BA06108                           | Soil | 1990 | Antibacterial<br>Gram-positive<br>with MIC (0.1-<br>0.39 µg/ml)and<br>some Gram-<br>negative MIC (0.1-<br>50µg/ml) | 57 |
| Antibiotic 6108C<br>(119)                                                            | Macrolide antibiotic<br>(unusual Tylosin-type) | <i>M. Pora fastidiosa</i>                                  | Soil | 1990 | Antibacterial                                                                                                      | 56 |
| Antibiotic 6108D<br>(120)                                                            |                                                |                                                            |      |      |                                                                                                                    | 58 |
| Rosamicin;6-Hydroxy<br>(121)                                                         | Macrolide                                      | <i>M. rosaria</i>                                          | Soil | 1990 | NA                                                                                                                 | 57 |
| Mycinamycin X, XI<br>(122,123)                                                       | Macrolide                                      | <i>M. griseorubida</i>                                     | Soil | 1991 | Antibacterial<br>mainly against<br>gram positive<br>bacteria                                                       | 59 |
| Mycinamycin IX, XII,<br>XIII, XIV, XV, XVI,<br>XVII, XVIII<br>(124-131)              | Macrolide                                      | <i>M. griseorubida</i>                                     | Soil | 1991 | Active against<br>gram positive<br>bacteria with MIC<br>value ranged from<br>(0.05- 12.5µg/ml).                    | 59 |
| AC6H<br>(132)                                                                        | Macrolide                                      | <i>M. carbonacea</i><br>subsp.<br>carbonacea K55-<br>AC6   | Soil | 1993 | Anticancer IC 50 (<br>6.25-25 µg/ml)                                                                               | 60 |
| Quinolidomicins A <sub>1</sub> , A <sub>2</sub> ,<br>and B <sub>1</sub><br>(133-135) | Polyene macrolides                             | <i>Micromonospora</i><br><i>sp. JY16 -</i><br>FERM BP-3940 | Soil | 1993 | Antitumor<br>IC <sub>50</sub> 327nM/ml).                                                                           | 61 |

|                                        |           |                                                   |        |      |                                                                                                                 |                            |
|----------------------------------------|-----------|---------------------------------------------------|--------|------|-----------------------------------------------------------------------------------------------------------------|----------------------------|
| 19-Decarbonyltylonolide<br>(136)       | Macrolide | <i>Micromonospora</i><br><i>sp.</i> YS 02930k     | Soil   | 1994 | NA                                                                                                              | 62                         |
| 16-Hydroxyprotoylonolide<br>(137)      | Macrolide | <i>Micromonospora</i><br><i>sp.</i> YS-02930K     | Soil   | 1994 | NA                                                                                                              | (Yasumuro et al.,<br>1994) |
| 19-Hydroxyprotoylonolide<br>(138)      |           |                                                   |        |      |                                                                                                                 |                            |
| Royamicin A(139)                       | Macrolide | <i>M. roseopurpurea</i><br><i>M90</i>             | Soil   | 1994 | Antibacterial<br>Antifungal                                                                                     | 63                         |
| Pyrrolosporin A<br>(140)               | Macrolide | <i>Micromonospora</i><br><i>sp.</i> ATCC<br>53791 | Soil   | 1996 | Antibacterial<br>Gram positive<br>MIC (0.5 - 4<br>µg/ml)<br>Gram negative<br>MIC (63-<br>125µg/ml)<br>Antitumor | 64<br>65                   |
| Galbonolide B, 21-<br>hydroxy<br>(141) | Macrolide | <i>Micromonospora</i><br><i>sp.</i> culture MA    | -----  | 1998 | Moderate<br>antifungal activity.                                                                                | 66                         |
| Rustmicin, 21-hydroxy<br>(142)         | Macrolide | <i>Micromonospora</i><br><i>sp.</i> culture MA    | -----  | 1998 | Antifungal activity<br>less than<br>rustamicin                                                                  | 66                         |
| Antibiotic IB 96212<br>(143)           | Macrolide | <i>Micromonospora</i><br><i>sp.</i>               | Marine | 2000 | Cytotoxic                                                                                                       | 67                         |
| Sch 351448<br>(144)                    | Macrolide | <i>Micromonospora</i> sp                          | Soil   | 2000 | A novel<br>ionophoric<br>compound and is<br>a weak activator of<br>low density                                  | 68                         |

lipoprotein  
receptor (LDL-R)  
promoter with an  
IC<sub>50</sub> 25 μM

|                                                      |                      |                                                      |                                 |      |                                                                                                                                                                                                                     |    |
|------------------------------------------------------|----------------------|------------------------------------------------------|---------------------------------|------|---------------------------------------------------------------------------------------------------------------------------------------------------------------------------------------------------------------------|----|
| Micromonospolide A,B,C<br>(145-147)                  | Macrolides           | <i>Micromonospora</i><br><i>sp. Nov.</i>             |                                 | 2001 | Specific inhibitor<br>of starfish<br>embryogenesis.<br>Micromonospolide<br>A,B,C<br>MIC of 0.01,<br>0.011, and 1.6<br>μg/mL,<br>respectively.                                                                       | 69 |
| Bafilomycin R 176502<br>Antibiotic R 176502<br>(148) | Macrolide antibiotic | <i>Micromonospora</i><br><i>sp.</i>                  | River<br>sediment               | 2003 | Cytotoxic                                                                                                                                                                                                           | 70 |
| Micromonosporin A<br>(149)                           | Macrolide            | <i>Micromonospora</i><br><i>sp.</i> (strain TT1-11). | Acidic peat<br>swamp<br>forest. | 2004 | NA                                                                                                                                                                                                                  | 71 |
| IZI (150)                                            | Macrolide            | <i>M. rosara</i><br>TPMA0001                         | -----                           | 2009 | NA                                                                                                                                                                                                                  | 72 |
| IZII,IZIII<br>(151,152)                              | Macrolides           | <i>M. rosara</i><br>TPMA0001                         | -----                           | 2010 | NA                                                                                                                                                                                                                  | 73 |
| levantilide A and B<br>(153,154)                     | Macrolides           | <i>Micromonospora</i><br>strain M71-A77              | Marine                          | 2011 | Anticancer against<br>gastric tumor cells<br>GXF 251L<br>(IC <sub>50</sub> 40.9 μM),<br>lung tumor cells<br>LXFL 529L (IC <sub>50</sub><br>39.4 μM),<br>mammary tumor<br>cells MAXF<br>401NL (IC <sub>50</sub> 28.3 | 74 |

μM), melanoma tumor cells MEXF 462NL (IC<sub>50</sub> 48.6 μM), pancreas tumor cells PAXF 1657L (IC<sub>50</sub> 20.7 μM) and renal tumor cells RXF 486L (IC<sub>50</sub> 52.4 μM).

|                                                     |           |                                      |        |      |                                                                                                                                                                   |    |
|-----------------------------------------------------|-----------|--------------------------------------|--------|------|-------------------------------------------------------------------------------------------------------------------------------------------------------------------|----|
| Juvenimicin C, 5-O-alpha-L-rhamnosyltylactone (155) | Macrolide | <i>Micromonospora sp.</i>            | Marine | 2013 | Antioxidant enhanced QR1 enzyme activity and glutathione levels by two-fold with CD values of 10.1 and 27.7 μM, respectively. QR1 (quinon reductase 1) Anticancer | 75 |
| Levantilide C (156)                                 | Macrolide | <i>Micromonospora sp.</i> FIM07-0019 | Marine | 2013 | Anticancer Against HL-60 (IC <sub>50</sub> 32.5 μM), MDA-MB-231 (IC <sub>50</sub> 26.8 μM), SW620 (IC <sub>50</sub> 16.4 μM) SMMC7721 (IC <sub>50</sub> 39.9 μM)  | 76 |

|                                                                                                                       |                              |                                                |                                                           |      |                                                                 |    |
|-----------------------------------------------------------------------------------------------------------------------|------------------------------|------------------------------------------------|-----------------------------------------------------------|------|-----------------------------------------------------------------|----|
| Micromonolactam<br>(157)                                                                                              | Macrolide                    | <i>Micromonospora sp</i>                       | Marine                                                    | 2013 | NA                                                              | 77 |
| Neaumycin B<br>(158)                                                                                                  | Macrolide                    | Micromonospora<br>sp. (strain CNY-<br>010)     | Surface of<br>the brown<br>alga<br>Styopodiu<br>m zonale, | 2018 | Potent Inhibitor of<br>Glioblastoma IC <sub>50</sub><br>(1μM).  | 78 |
| Tetrocarcin A<br>Antlermicin A<br>(159,160)                                                                           | Tetrocarcin                  | <i>M. chalcea</i> subsp.<br><i>kazunoensis</i> | Soil                                                      | 1980 | Antibacterial<br>MIC (0.015 μg/ml)<br>Antitumor<br>Antimalarial | 79 |
| Tetrocarcin complex A,<br>B, C<br>(161-163)                                                                           | Tetrocarcin                  | <i>M. chalcea</i><br>KY11091                   | Soil                                                      | 1980 | Antitumor                                                       | 80 |
| Tetrocarcin G,H,K,L<br>(164-167)                                                                                      | Tetrocarcin                  | <i>M. chalcea</i><br>KY11091                   | Soil                                                      | 1980 | Antibacterial                                                   | 80 |
| Tetronolide<br>Antibiotic F2<br>(168)                                                                                 | Spirotetronate<br>glycosides | <i>M. chalcea</i>                              | Soil                                                      | 1980 | Antibacterial<br>Antitumor                                      | 80 |
| Tetrocarcin E1 (A)<br>Tetrocarcin E2 (A)<br>Tetrocarcin F1 (A)<br>Tetrocarcin M<br>Tetrocarcin J<br>Tetrocarcin I (A) | Aglycon of tetrocarcin<br>A  | <i>M. chalcea</i>                              | Soil                                                      | 1980 | Antibacterial<br>Antitumor                                      | 80 |
|                                                                                                                       | Spirotetronate<br>glycoside  | <i>M. chalcea</i>                              | Soil                                                      | 1982 | Antibacterial<br>MIC (3-<br>150μg/ml).                          | 81 |

Tetrocarcin F (A)

Tetrocarcin C (A)

Tetrocarcin D (A)

Tetrocarcin L

Tetrocarcin K Tetrocarcin

B

(169-180)

Arisostatin A&B

New analogs of  
tetrocarcin A

*Micromonospora*  
sp. TP-A0316

Sea water  
sample

2000

Antibacterial  
MIC (0.39-25µM.  
Antitumor  
IC50 (0.059- 0.26  
µM)

82

(181,182)

Tetrocarcin P

Tetrocarcin

*M. harpali* SCSIO  
GJ089.

Sediment  
sample.

2017

Antibacterial  
MIC (1 -2µg/ml)  
against *Bacillus*.

83

(183)

Spirotetronate  
glycoside.

Marine

22-dehydroxymethyl-  
kijanolid

Spirotetronate  
glycoside.

*M. harpali* SCSIO  
GJ089.

Sediment  
sample.

2017

NA

83

(184)

Marine

8-hydroxy-22-  
dehydroxymethyl-  
kijanolid

Spirotetronate  
glycoside.

*M. harpali* SCSIO  
GJ089.

Sediment  
sample

2017

NA

83

(185)

Marine

Microsporانات A-F

Spirotetronate  
glycoside.

*M. harpali* SCSIO  
GJ089.

Sediment  
sample

2017

Antibacterial  
activity

83

(186-191)

Marine

Tetrocarcin N, H,Q

Tetrocarcin

*M. carbonacea*  
LS276

sponge  
*Gelliodes*

2018

Antibacterial  
activity against  
*Bacillus subtilis*  
(MIC) value of  
12.5 µM.

83

(192-194)

Spirotetronate  
glycoside

*carnosa*,



|                                                                |                               |                                              |      |      |                                                                                  |                                  |
|----------------------------------------------------------------|-------------------------------|----------------------------------------------|------|------|----------------------------------------------------------------------------------|----------------------------------|
| Actinomycins<br>(195)                                          | Polypeptide                   | <i>Micromonospora</i><br><i>sp.</i> 608      | Soil | 1951 | Anticancer                                                                       | 84                               |
| Microcins A and B<br>(196 -197)                                | Peptides                      | <i>M. fuscus</i>                             | Soil | 1952 | -----                                                                            | (Taira and Fugii .,<br>1952)     |
| Bottromycin<br>(198)                                           | Cyclic peptide                | <i>M. chalcea</i>                            | Soil | 1966 | NA                                                                               | 85                               |
| Antibiotic SF 1919<br>(199)                                    | Peptide.                      | <i>Micromonospora</i><br><i>sp.</i> SF-1919, | Soil | 1977 | Antibacterial                                                                    | Japan. Pat., 1977,<br>77 136 995 |
| Antibiotic 68-1147<br>(200)                                    | Thiazole-peptide              | <i>M. arborensis</i><br><i>NRRL8041</i>      | Soil | 1978 | Antibacterial                                                                    | 86                               |
| Sch 18640<br>(201)                                             | Peptide                       | <i>M. arborensis</i><br><i>NRRL8041</i>      | Soil | 1978 | Antibacterial                                                                    | . 86                             |
| Epideoxynegamycin<br>(202)                                     | peptide                       | <i>Micromonospora sp</i>                     | Soil | 1979 | NA                                                                               | 87                               |
| Antibiotic PA 4046-I<br>(203)                                  | peptide                       | <i>M. miyakonensis</i><br>PA4046             | Soil | 1981 | NA                                                                               | 88                               |
| N-(2,6-diamino-6-<br>hydroxymethylpimelyl)<br>-L-alanine (204) | Dipeptide                     | <i>M. chalcea</i> PA-3534                    | Soil | 1981 | Antibacterial                                                                    | 89                               |
| Antibiotic PA 3534J<br>(205)                                   | Dipeptide                     | <i>M. chalcea</i> PA-<br>3534                | Soil | 1981 | Active against E.<br>coli.                                                       | 89                               |
| Antibiotic M 9026<br>(206)                                     | Peptide antibiotic<br>complex | <i>Micromonospora</i><br><i>sp.</i>          | Soil | 1987 | Antibacterial<br>Anticancer                                                      | 90                               |
| Antibiotic S 54832A<br>(207)                                   | Depsipeptide<br>antibiotics   | <i>M. globosa</i>                            | Soil | 1984 | Active against<br>Gram-positive<br>bacteria,<br>mycoplasmas and<br>Neisseriae sp | 91                               |
| Antibiotic S 54832A-I<br>(208)                                 | Depsipeptide<br>antibiotics   | <i>M. auratinigra</i>                        | Soil | 1984 | No activity                                                                      | 91                               |
| Chloropolysporin B<br>Chloropolysporin C                       | Glyco peptide                 | <i>Micromonospora</i><br><i>sp.</i>          | Soil | 1987 | Antibacterial<br>Animal growth                                                   | 92                               |

|                                             |                    |                                                                |                                          |      |                                                                                                                               |               |
|---------------------------------------------|--------------------|----------------------------------------------------------------|------------------------------------------|------|-------------------------------------------------------------------------------------------------------------------------------|---------------|
| (209,210)                                   |                    |                                                                |                                          |      | promoter.                                                                                                                     |               |
| Sch 37137<br>(211)                          | Dipeptides         | <i>Micromonospora</i><br><i>sp. SCC</i><br>1792                | Soil                                     | 1988 | Antifungal activity<br>against <i>Candida</i><br><i>sp.</i> (MICs >12<br>µg/ml) and<br>dermatophytes<br>(MICs >0.8<br>µg/ml). | <sup>93</sup> |
| Korkormicins<br>A-G)<br>(212 – 218)         | Depsipeptide       | <i>Micromonospora</i><br><i>sp. C39500</i>                     | Soil                                     | 1995 | Antibacterial<br>MIC (0.13- 0.5<br>µg/ml).<br>Anticancer (in<br>vivo 0.05-0.20 mg/<br>kg(IP) .                                | <sup>94</sup> |
| Rakicidin A<br>(219)                        | Cyclic lipopeptide | <i>Micromonospora</i><br><i>sp. R385-2a</i>                    | Soil                                     | 1995 | Cytotoxic IC <sub>50</sub><br>(40ng/ml).                                                                                      | <sup>95</sup> |
| Rakicidin B<br>Antibiotic FW 523-3<br>(220) | Cyclic lipopeptide | <i>M. chalcea</i> and a<br><i>Micromonospora</i><br><i>sp.</i> | Marine                                   | 1995 | Anticancer,<br>Induces apoptosis.<br>Immunosuppressa<br>nt.<br>IC <sub>50</sub> (200ng/ml).                                   | <sup>95</sup> |
| Thiocoraline<br>(221)                       | Thiodepsipeptide   | <i>Micromonospora</i><br><i>sp. ACM2-</i><br>092               | Marine<br>,Soft coral<br>and<br>mollusk. | 1997 | Cytotoxic activity<br>IC <sub>50</sub><br>(0.002µg/ml).<br>Antibacterial<br>MIC (0.03-0.05<br>µg/ml)                          | <sup>96</sup> |
| Antibiotic Sch 40832<br>(222)               | Peptide            | <i>M. carbonaceae</i><br><i>var. africana</i>                  | Soil                                     | 1998 | Antibacterial                                                                                                                 | <sup>97</sup> |
| Antibiotic Sch 49088<br>(223)               | Oligosaccharide    | <i>M. carbonaceae</i>                                          | Soil                                     | 1998 | NA                                                                                                                            | <sup>98</sup> |
| Actinomycin Z <sub>1</sub> -Z <sub>5</sub>  | Chromopeptide      | <i>M. floridensis</i>                                          | Soil                                     | 2000 | Antibacterial , B.                                                                                                            | <sup>99</sup> |

|                                 |                                |                                              |                                             |      |                                                                                                                                                            |                                                                                                |  |
|---------------------------------|--------------------------------|----------------------------------------------|---------------------------------------------|------|------------------------------------------------------------------------------------------------------------------------------------------------------------|------------------------------------------------------------------------------------------------|--|
| (224-228)                       |                                |                                              |                                             |      |                                                                                                                                                            | subtilis. MIC<br>12.5, 0.20, 0.78<br>µg/ml.<br>Anticancer IC <sub>50</sub><br>(0.28-50 µg/ml). |  |
| Telomycin<br>(229)              | Macrocyclic<br>peptide lactone | <i>M.</i><br><i>schwarzwaldensis</i>         | Soil                                        | 2013 | Antibacterial<br>activity                                                                                                                                  | 100                                                                                            |  |
| Cyclo-(Pro-Trp)<br>(230)        | Peptide                        | <i>Micromonospora</i><br>sp. (strain G044)   | sponge<br><i>Tethya</i><br><i>aurantium</i> | 2017 | Antibacterial<br>against E-coli<br>MIC 128µg/ml.                                                                                                           | 101                                                                                            |  |
| Cyclo-(Pro-Met)<br>(231)        | Peptide                        | <i>Micromonospora</i><br>sp. (strain G044)   | sponge<br>Tethya<br>aurantium               | 2017 | NA                                                                                                                                                         | 101                                                                                            |  |
| Cyclo-(Pro-Val)<br>(232)        |                                |                                              |                                             |      |                                                                                                                                                            |                                                                                                |  |
| Uridine<br>(233)                | Peptide                        | <i>Micromonospora</i><br>sp. (strain G044)   | sponge<br>Tethya<br>aurantium               | 2017 | NA                                                                                                                                                         | 101                                                                                            |  |
| Rakicidins G, H, I<br>(234-237) | Cyclic depsipeptides           | <i>M.</i><br><i>chalcea</i> FIM 02-523       | Marine                                      | 2018 | Cytotoxic<br>IC <sub>50</sub> (0.00783-<br>0.0207<br>µg/ml))hypoxia<br>IC <sub>50</sub> (0.148-<br>0.188µg/ml).<br>Antibacterial<br>MIC (0.125-<br>8µg/ml) | 102                                                                                            |  |
| Rakicidin E<br>(238)            | Cyclic depsipeptide            | <i>M. chalcea</i> FIM<br>02-523              | Marine                                      | 2018 | Cytotoxic<br>Antibacterial<br>MIC (2-32 µg/ml)                                                                                                             | 102                                                                                            |  |
| Izumenolide<br>(239)            | Lactone                        | <i>M. chalcea</i> subsp.<br><i>izumensis</i> | Soil                                        | 1980 | Antibacterial                                                                                                                                              | 103                                                                                            |  |

|                                                                                              |                          |                                                                                                 |      |      |                                                                                                                                             |                                 |
|----------------------------------------------------------------------------------------------|--------------------------|-------------------------------------------------------------------------------------------------|------|------|---------------------------------------------------------------------------------------------------------------------------------------------|---------------------------------|
| Dotriacolide<br>(240)                                                                        | Lactone                  | SC 11133<br><i>M. echinospora</i>                                                               | Soil | 1981 | Antibacterial                                                                                                                               | 104                             |
| 3, 4-Dihydrodotriacolide<br>(241)                                                            | Lactone                  | MG299-fF35<br><i>M. echinospora</i>                                                             | Soil | 1981 | NA                                                                                                                                          | 104                             |
| Antascomicins<br>A,B,C,D,E<br>(242-246)                                                      | Macrocyclic<br>lactones  | <i>Micromonospora</i><br><i>sp.</i> DSM<br>8429                                                 | Soil | 1996 | Antagonize the<br>immunosuppressiv<br>e<br>activity of FK506<br>and rapamycin<br>(FKBP12<br>binding molecules)<br>(IC <sub>50</sub> 0.7 nM) | 105                             |
| Cymbimicin A and B<br>(247,248)                                                              | Lactone                  | <i>Micromonospora</i><br><i>sp.</i> DSM<br>8594                                                 | Soil | 1997 | Immuno-<br>suppressive.                                                                                                                     | 105                             |
| Antibiotic PA 2046<br>(249)                                                                  | Pyranonaphthoquinon<br>e | <i>M. nakanoshimensis</i>                                                                       | Soil | 1981 | Antitumor                                                                                                                                   | Japan. Pat., 1981,<br>81 73 096 |
| M-92, M-92 BN-3, M-92<br>VA-2, M-92 BA-4, M-92<br>BA-5, M-92 BN-1, M-92<br>BN-2<br>(250-256) | Naphthoquinone           | <i>M. verruculosa</i> M-<br>92                                                                  | Soil | 1982 | Antibacterial<br>activity<br>Anticancer activity                                                                                            | 106                             |
| Crisamicin A<br>(257)                                                                        | Naphthoquinone           | <i>M.</i><br><i>purpureochromogen</i><br><i>es</i><br>subsp. <i>halotolerans</i><br>RV-79-9-101 | Soil | 1986 | Antibacterial<br>activity<br>MIC (0.2-<br>10µg/ml).<br>Anticancer activity                                                                  | 107                             |
| Crisamicin C<br>(258)                                                                        | Naphthoquinone           | <i>M.</i><br><i>purpureochromogen</i><br><i>es</i>                                              | Soil | 1988 | Antibacterial<br>MIC (0.125-<br>0.25µg/ml).                                                                                                 | 108                             |

|                                                                                |                |                                     |        |      |                                                                                     |                               |
|--------------------------------------------------------------------------------|----------------|-------------------------------------|--------|------|-------------------------------------------------------------------------------------|-------------------------------|
| Crisamicin C (Epoxide)<br>(259)                                                | Naphthoquinone | <i>M. purpureochromogenes</i>       | Soil   | 1988 | NA                                                                                  | 108                           |
| Antibiotic A 35566B<br>(260)                                                   | Naphthoquinone | <i>Micromonospora</i> sp. SANK 6039 | Soil   | 1995 | Cytotoxic                                                                           | Japan. Pat., 1995, 95 316 091 |
| Antibiotic A 35566A (4'-Ketone) (261)                                          | Naphthoquinone | <i>Micromonospora</i> sp. SANK 6039 | Soil   | 1995 | Cytotoxic                                                                           | Japan. Pat., 1995, 95 316 091 |
| 9-Hydroxycrisamicin A<br>(262)                                                 | Naphthoquinone | <i>Micromonospora</i> sp. SA246     | Soil   | 1997 | Antibacterial, cytotoxic                                                            | 109                           |
| 1-Hydroxycrisamicin A<br>(263)                                                 | Naphthoquinone | <i>Micromonospora</i> sp. SA246     | Soil   | 1997 | Antibacterial, MIC (0.78-3.12 µg/ml) cytotoxic                                      | 109                           |
| 7-Methoxy-2-propyl-5,12-naphthacenedione<br>(264)                              | Naphthoquinone | <i>Micromonospora</i> sp. JN79761   | Marine | 2012 | NA                                                                                  | 110                           |
| 1,2,3,4-Tetrahydro-2-hydroxy-7-methoxy-2-propyl-5,12-naphthacenedione<br>(265) | Naphthoquinone | <i>Micromonospora</i> sp. JN79761   | Marine | 2012 | NA                                                                                  | 110                           |
| K 259-2<br>(266)                                                               | Quinone        | <i>M. Olivasterospora</i>           | Soil   | 1987 | Inhibitor of Ca <sup>2+</sup> and cyclic nucleotide phosphodiesterase. Vasodilator. | 111                           |
| Citreamicin ξ<br>Citreamicin β<br>Citreamicin γ<br>Citreamicin η<br>(267-270)  | Quinone        | <i>M. citrea</i>                    | Soil   | 1990 | Feed additive                                                                       | 112                           |

|                                                                    |                                        |                                             |        |      |                                                                                                                              |     |
|--------------------------------------------------------------------|----------------------------------------|---------------------------------------------|--------|------|------------------------------------------------------------------------------------------------------------------------------|-----|
| Antibiotic GTRI-BB<br>(crysamicin analog)<br>(271)                 | Quinone                                | <i>Micromonospora</i><br><i>sp.</i> SA-24   | Soil   | 2002 | Cytotoxic GI <sub>50</sub><br>(0.08-0.31µg/ml).                                                                              | 113 |
| Streptonigrin<br>7-(1-methyl-2<br>oxopropyl)streptonigrin<br>(272) | Quinone                                | <i>Micromonospora</i><br><i>sp.</i> IM 2670 | Soil   | 2002 | Cytotoxic activity                                                                                                           | 114 |
| Kosinostatin<br>(273)                                              | Quinocycline                           | <i>Micromonospora</i><br><i>sp.</i> TPA0468 | Marine | 2002 | NA                                                                                                                           | 115 |
| Fluostatins C-F<br>(274-277)                                       | Quinone                                | <i>M.</i><br><i>rosaria</i> SCSIO<br>N160   | Marine | 2012 | NA                                                                                                                           | 116 |
| Fluostatins I–K<br>(278-280)                                       | Quinone                                | <i>M.</i><br><i>rosaria</i> SCSIO<br>N160   | Marine | 2012 | NA                                                                                                                           | 116 |
| Phenanthroviridone<br>(281)                                        | Quinone                                | <i>M.</i><br><i>rosaria</i> SCSIO<br>N160   | Marine | 2012 | Antibacterial<br>Staphylococcus<br>aureus MIC 1.0<br>µg/mL<br>Antitumor<br>IC <sub>50</sub> (0.09 ± 0.04 -<br>2.18 ± 0.01µM) | 116 |
| Lagumycin B (282),<br>Dehydrorabelomycin<br>(283), WS-5995 A (284) | Angucycline                            | <i>Micromonospora</i><br><i>sp.</i>         | Marine | 2015 | Cytotoxic                                                                                                                    | 117 |
| Cervinomycin A <sub>1</sub><br>(285)                               | Xanthone                               | <i>Micromonospora</i><br><i>sp.</i> M39     | Soil   | 2004 | Antibacterial                                                                                                                | 118 |
| Dynemicin A<br>(286)                                               | Anthraquinone<br>(Eneidyne antibiotic) | <i>M. chersina</i> ATCC<br>53710            | Soil   | 1989 | Antibacterial<br>activity<br>Anticancer activity                                                                             | 119 |
| Deoxydynemicin A<br>(287)                                          | Anthraquinone                          | <i>M. globosa</i> FERM<br>P-10651           | Soil   | 1990 | Antibacterial<br>activity                                                                                                    | 120 |

|                                                                                    |                      |                            |                                                                         |      |                                                       |                                 |
|------------------------------------------------------------------------------------|----------------------|----------------------------|-------------------------------------------------------------------------|------|-------------------------------------------------------|---------------------------------|
| Dynemicins L, M, and N<br>(288-290)                                                | Anthraquinones       | <i>M. chersina</i> M 965-1 | Soil                                                                    | 1991 | Antibacterial ,<br>cytotoxic less than<br>dynemicin A | 121                             |
| Dynemicins O, P, and Q<br>(291-293)                                                | Anthraquinones       | <i>M. chersina</i> M 965-1 | Soil                                                                    | 1991 | Antibacterial<br>cytotoxic                            | 122                             |
| Endynamicin A and B<br>(294-295)                                                   | Anthraquinones       | <i>M. globosa</i>          | Soil                                                                    | 1991 | Antineoplastic                                        | Japan. Pat., 1991,<br>91 63 281 |
| Dynemicin C<br>(296)                                                               | Enediynes antibiotic | <i>M. chersina</i>         | Soil                                                                    | 1992 | NA                                                    | Eur. Pat., 1992, 484<br>856     |
| Lupinacidins<br>A, B<br>(297,298)                                                  | Anthraquinone        | <i>M. lupine</i> Lupac 08  | Root<br>nodules of<br><i>Lupinus</i><br><i>Angustifoli</i><br><i>us</i> | 2007 | Anticancer                                            | 123                             |
| 2-Ethyl-1,8-dihydroxy-3-<br>Methylanthraquinone<br>(299)                           | Anthraquinone        | <i>M. rhodorangea</i>      | Marine                                                                  | 2009 | NA                                                    | 124                             |
| 3,8-Dihydroxy-1-<br>propylanthraquinone<br>(300)                                   | Anthraquinone        | <i>M. rhodorange</i>       | Marine                                                                  | 2009 | NA                                                    | 124                             |
| 3,8-Dihydroxy-1-<br>propylanthraquinone-2-<br>carboxylic acid; 3-Me<br>ether (301) | Anthraquinone        | <i>M. rhodorange</i>       | Marine                                                                  | 2009 | NA                                                    | 124                             |
| Lupinacidin C<br>(302)                                                             | Anthraquinone        | <i>M. lupini</i> Lupac 08  | Root<br>nodules of<br><i>Lupinus</i><br><i>Angustifoli</i>              | 2011 | Anticancer                                            | 125                             |

|                                                                                                                    |                             |                                                   |              |      |                                                                                                                 |                             |
|--------------------------------------------------------------------------------------------------------------------|-----------------------------|---------------------------------------------------|--------------|------|-----------------------------------------------------------------------------------------------------------------|-----------------------------|
| Homo-ε-rhodomyconone<br>(303)                                                                                      | Anthraquinone               | <i>Micromonospora</i><br><i>sp. JN797618</i>      | us<br>Marine | 2012 | Cytotoxic                                                                                                       | 126                         |
| Rabelomycin<br>(304)                                                                                               | Anthraquinone               | <i>M.</i><br><i>rosaria</i> SCSIO<br>N160         | Marine       | 2012 | Antibacterial<br>Staphylococcus<br>aureus MIC 0.25<br>µg/ml<br>Antitumor<br>IC50 (4.28 ± 0.08-<br>9.91 ± 0.08). | 116                         |
| Nocardorubin<br>(305)                                                                                              | Anthracycline               | <i>M. narashino</i>                               | Soil         | 1954 | Antibacterial agent                                                                                             | 127                         |
| Doxorubicin, 11-deoxy<br>Daunorubicin, 11-deoxy-<br>13-dihydro<br>Daunorubicin, 11-deoxy-<br>13-deoxo<br>(306-308) | Anthracycline<br>glycosides | <i>Micromonospora spp</i>                         | Soil         | 1980 | Antibacterial<br>Cytotoxic                                                                                      | 128                         |
| Micromonosporin C<br>Micromonosporin B<br>(309,310)                                                                | Anthracycline               | <i>Micromonospora</i><br><i>sp. ATCC 10026</i>    | Soil         | 1987 | Antitumor<br>Antibacterial                                                                                      | 129                         |
| Spartanamicins A and B<br>(311,312)                                                                                | Anthracycline               | <i>Micromonospora</i><br><i>sp. ATCC</i><br>53803 | Soil         | 1992 | Antifungal<br>MIC (0.2-<br>1µg/ml).                                                                             | 130                         |
| Cororubicin (313)                                                                                                  | Anthracycline               | <i>Micromonospora</i><br><i>sp. JY16</i>          | Soil         | 1994 | Antitumor ,<br>cytotoxic                                                                                        | 131                         |
| Bravomicin A ,B,C,D,E<br>and F (314-319)                                                                           | Anthracycline               | <i>M. polytota</i><br>ATCC 202091                 | Soil         | 1999 | Antibacterial                                                                                                   | US Pat., 1999, 5<br>994 543 |



|                                                                 |                                       |                                                                                                                                                                    |                                   |      |                                                      |                                                 |
|-----------------------------------------------------------------|---------------------------------------|--------------------------------------------------------------------------------------------------------------------------------------------------------------------|-----------------------------------|------|------------------------------------------------------|-------------------------------------------------|
| Kosinostatin<br>(320)                                           | Anthracycline                         | <i>Micromonospora</i><br><i>sp. TP-A0468</i>                                                                                                                       | Marine                            | 2002 | NA                                                   | 115                                             |
| Micromonomycin<br>(321)                                         | Anthracycline                         | <i>Micromonospora</i><br><i>sp.</i>                                                                                                                                | Soil                              | 2004 | Antibacterial<br>activity<br>Antifungal activity     | 132                                             |
| Keyicin(322)                                                    | Anthracycline                         | <i>Micromonospora</i><br><i>sp.</i>                                                                                                                                | Marine                            | 2017 | Antibacterial                                        | 133                                             |
| Galtamycin B<br>(323)                                           | Anthracycline                         | <i>Micromonospora</i><br><i>sp. Tü 6368</i>                                                                                                                        | Soil                              | 2005 | Cytostatic activity<br>< 1µg/ml.                     | 134                                             |
| Anthracyclinones<br>(324)                                       | Anthracyclinones                      | <i>Micromonospora</i><br><i>sp.</i>                                                                                                                                | Tunicate<br>Eudistoma<br>vannamei | 2012 | NA                                                   | 126                                             |
| Echinosporamicin<br>(325)                                       | Echinosporamicin                      | <i>M. echinospora</i><br>subsp.<br><i>echinospora</i> LL-<br>P17                                                                                                   | Soil                              | 2004 | Antibacterial<br>Against MRSA<br>MIC < 0.12 µg/ml.   | 135                                             |
| TLN-05220<br>TLN-05223<br>(326-327)                             | Echinosporamicin<br>-type antibiotics | <i>M. echinospora</i><br>subsp.<br><i>challisensis</i> NRRL<br>12255                                                                                               | Soil                              | 2009 | Antitumour<br>antibacterial                          | 136                                             |
| Everninomicins<br>(328)                                         | Oligosaccharides                      | <i>M. carbonacea</i><br>NRRL 2972<br><i>M. carbonacea</i><br>subsp.<br><i>aurantiaca</i> NRRL<br>2997<br><i>M. carbonacea</i> var.<br><i>africana</i><br>ATCC39149 | Soil                              | 1964 | Antibacterial                                        | 137                                             |
| Orthosomycin B<br>Orthosomycin C<br>Orthosomycin D<br>(329-331) | Oligosaccharide                       | <i>Micromonospora</i><br><i>carbonacea</i> var.<br><i>Africana</i>                                                                                                 | Soil                              | 1997 | Show activity<br>against<br>Staphylococcus<br>aureus | Pat. Coop. Treaty<br>(WIPO), 1997, 97<br>13 777 |

|                                                 |                         |                                                                                                                         |      |      |                                                                                 |     |
|-------------------------------------------------|-------------------------|-------------------------------------------------------------------------------------------------------------------------|------|------|---------------------------------------------------------------------------------|-----|
| SCH-27899 ( Ziracin)<br>(332)                   | Oligosaccharide         | <i>M. carbonacea</i>                                                                                                    | Soil | 1999 | Antibacterial activity                                                          | 138 |
| Antibiotic Sch 58761<br>Orthosomycin A<br>(333) | Oligosaccharide         | <i>Micromonospora carbonaceae</i>                                                                                       | Soil | 2000 | Active against multidrug-resistant bacteria                                     | 139 |
| Antibiotic Sch 58773<br>Orthosomycin G<br>(334) | Oligosaccharide         | <i>M. carbonacea</i> var. <i>africana</i>                                                                               | Soil | 2002 | NA                                                                              | 34  |
| Antibiotic Sch 58771<br>Orthosomycin F<br>(335) | Oligosaccharide         | <i>M. carbonacea</i> var. <i>africana</i>                                                                               | Soil | 2002 | Active against <i>S. aureus</i>                                                 | 34  |
| Antibiotic Sch 58769<br>(336)                   | Oligosaccharide         | <i>M. carbonacea</i> var. <i>africana</i>                                                                               | Soil | 2002 | Active against <i>S. aureus</i>                                                 | 34  |
| Garosamine (L-form)<br>(337)                    | Sugar                   | Sugar component of Gentamicin C1a and Gentamicin C1, antibiotic complexes from fermentations of <i>Micromonospora</i> . | ---- | 1977 | NA                                                                              | 5   |
| Trehazolin<br>(338)                             | Pseudodisaccharide      | <i>Micromonospora</i> sp. SANK 62390                                                                                    | Soil | 1991 | Trehalase glycosidase inhibitor                                                 | 140 |
| Sibanomicin<br>Antibiotic SF 2364<br>(339)      | Pyrrole benzodiazepines | <i>Micromonospora</i> sp. SF2364                                                                                        | Soil | 1988 | Anticancer<br>Antibacterial<br>Gram + ve (MICs12.5-100 µg/ml)<br>Gram –ve (50 - | 141 |

>100).

|                                                                                    |                             |                                                       |        |      |                                                                      |     |
|------------------------------------------------------------------------------------|-----------------------------|-------------------------------------------------------|--------|------|----------------------------------------------------------------------|-----|
| BU-4664L<br>(340)                                                                  | Dibenzazepines              | <i>Micromonospora</i><br><i>sp.</i> ATCC<br>55378     | Soil   | 1996 | Anti-inflammatory<br>anti-tumor                                      | 142 |
| Neihumicin<br>(341)                                                                | Pyrazines                   | <i>M. neihuenis</i> NH3-1<br>Wu                       | Soil   | 1988 | Cytotoxic activity.<br>Antifungal<br>activity.<br>IC 50 (0.49 µg/ml) | 143 |
| LL-E19085 alpha<br>Citreamicin α<br>(342)                                          | Oxazole<br>Quinone          | <i>M. citrea</i> NRRL<br>18351                        | Soil   | 1989 | Antibacterial MIC<br>< 0.12 µg/ml.                                   | 144 |
| Citreamicins<br>(343)                                                              | Oxazole<br>Quinone          | <i>M. citrea</i> NRRL<br>18351                        | Soil   | 1990 | Antibacterial<br>activity<br>MIC <0.015µg/ml.                        | 112 |
| Trehalamine<br>(344)                                                               | Oxazoles                    | <i>Micromonospora</i><br><i>sp.</i> SANK<br>62390     | Soil   | 1993 | Inhibit rat<br>intestinal<br>sucrase                                 | 145 |
| 5-Chloro-6-methoxy-1-<br>methylisatin<br>(345)                                     | Indole                      | Metab. of<br><i>M.carbonaceae</i>                     | Soil   | 1967 | NA                                                                   | 146 |
| 5'-hydroxystaurosporine<br>(346)                                                   | Indol carbazole<br>alkaloid | <i>Micromonospora</i><br><i>sp.</i> L-31-<br>CLCO-002 | Sponge | 2000 | Cytotoxic activity<br>IC50 (0.002-0.02<br>µg/ml).                    | 147 |
| 4'-N-methyl-<br>5'hydroxystaurosporine<br>(347)                                    | Indol carbazole<br>alkaloid | <i>Micromonospora</i><br><i>sp.</i> L-31-<br>CLCO-002 | Sponge | 2000 | Cytotoxic activity<br>IC50 (0.002-0.04<br>µg/ml).                    | 147 |
| Skatole-2-carboxylic acid<br><br>3-Methyl-1H-indole-2-<br>carboxylic acid<br>(348) | Indole                      | <i>Micromonospora</i><br><i>sp.</i> P1068.            |        | 2005 | NA                                                                   | 148 |
| 5-Chloro-1H-indole-3-                                                              | Indole                      | <i>Micromonospora</i>                                 | Marine | 2013 | NA                                                                   | 76  |

|                                                                                                                      |                                             |                                            |                                                  |      |                                                                                                                        |     |
|----------------------------------------------------------------------------------------------------------------------|---------------------------------------------|--------------------------------------------|--------------------------------------------------|------|------------------------------------------------------------------------------------------------------------------------|-----|
| carboxylic acid<br>(349)                                                                                             |                                             | <i>sp.</i> FIM07-0019                      |                                                  |      |                                                                                                                        |     |
| 3-Hydroxymethyl- $\beta$ -<br>carboline (350),<br>3-Methyl-<br>$\beta$ -carboline (351),<br>$\beta$ -Carboline (352) | $\beta$ -carboline                          | Micromonospora<br><i>sp.</i> M2DG17        | Marine                                           | 2011 | Cytotoxic                                                                                                              | 149 |
| Antibiotic MS 444<br>Antibiotic BE 34776<br>(353)                                                                    | Furan                                       | <i>Micromonospora</i><br><i>ssp</i>        |                                                  | 1995 | Antitumour,<br>vasodilator,<br>inhibitor of myosin<br>light chain kinase                                               | 150 |
| Antibiotic SB 219383<br>(354)                                                                                        | Furan                                       | <i>Micromonospora sp</i><br>NCIMB<br>40684 | Soil                                             | 2000 | Tyrosyl tRNA<br>synthetase<br>inhibitor.<br>Antibacterial<br>activity<br>MIC (0.32-0.64<br>$\mu$ g/ml).                | 151 |
| 3-(4-Hydroxyphenyl)-N-<br>methylpropanamide<br>(355)                                                                 | Amide                                       | <i>Micromonospora</i><br><i>sp.</i> P1068  |                                                  | 2005 | NA                                                                                                                     | 148 |
| Lomaiviticins<br>A and B<br>(356,357)                                                                                | Dimeric<br>diazobenzofluorene<br>glycosides | <i>M. lomaivitiensis</i><br>LL-371366      | Ascidian<br>Polysyncrator<br>lithostrotum        | 2001 | Antitumor<br>Antibacterial                                                                                             | 152 |
| Sch 725418<br>(358)                                                                                                  | Diketopiperazine                            | <i>Micromonospora</i><br><i>sp.</i>        | -----                                            | 2004 | Antifungal<br>MIC (32 $\mu$ g/ml).                                                                                     | 153 |
| Diazepinomicin<br>(359)                                                                                              | Natural<br>dibenzodiazepine                 | <i>Micromonospora</i><br><i>sp.</i> DPJ12  | Ascidian<br><i>Didemnum</i><br><i>Proliferum</i> | 2004 | Anticancer activity<br>IC <sub>50</sub> = 72.4 $\pm$ 5.3<br>$\mu$ M)<br>Anti-inflammatory<br>Antiparasitic<br>activity | 154 |
|                                                                                                                      |                                             | <i>Micromonospora</i><br><i>sp.</i> RV115  | Sponge<br><i>Aplysina</i><br><i>aerophoba</i>    |      |                                                                                                                        |     |

|                                                                                   |            |                                                                                                                                     |           |      |                                                              |                             |
|-----------------------------------------------------------------------------------|------------|-------------------------------------------------------------------------------------------------------------------------------------|-----------|------|--------------------------------------------------------------|-----------------------------|
| Halomicin D<br>(360)                                                              | Ansamycin  | <i>M. halophytica</i>                                                                                                               | Soil      | 1967 | Antibacterial<br>Antifungal                                  | 155                         |
| Rifamycins<br>(361)                                                               | Ansamysins | <i>M. lacustris</i> ATCC<br>21975                                                                                                   | Soil      | 1977 | Antibacterial<br>activity                                    | 156                         |
| 3-(Methylthio)rifamycin<br>(362)                                                  | Ansamycin  | <i>M. lacustris</i>                                                                                                                 | Soil      | 1977 | Antibacterial<br>Active against<br>gram positive<br>bacteria | 156                         |
| 3-(Methylthio)rifamycin;<br>16,17,18,19,28,29-<br>Hexahydro<br>(363)              | Ansamycin  | <i>M. lacustris</i>                                                                                                                 | Soil      | 1977 | NA                                                           | 156                         |
| 3-(Methylthio)rifamycin<br>S<br>(364)                                             | Ansamycin  | <i>M. lacustris</i>                                                                                                                 | Soil      | 1977 | Antibacterial<br>Active against<br>gram positive<br>bacteria | 156                         |
| 3-(Methylthio)rifamycin;<br>1,4-Quinone,<br>16,17,18,19,28,29-<br>hexahydro (365) | Ansamycin  | <i>M. lacustris</i>                                                                                                                 | Soil      | 1977 | NA                                                           | 156                         |
| Antibiotic CP 43038<br>Antibiotic CP 42752<br>Antibiotic CP 43139<br>(366-368)    | Ansamycin  | <i>M. saitamica.</i>                                                                                                                | Soil      | 1977 | NA                                                           | US Pat., 1977, 4<br>032 631 |
| Halomicins<br>A,B,C<br>(369-371)                                                  | Ansamysins | <i>M. halophytica</i><br>subsp.<br><i>halophytica</i> NRRL<br>2998<br><br><i>M. halophytica</i><br>subsp. <i>nigra</i><br>NRRL 3097 | Salt pool | 1977 | Antibacterial<br>Antifungal                                  | 157                         |
| Rifamycin S<br>(372)                                                              | Ansamycin  | <i>Micromonospora</i><br><i>spp.</i>                                                                                                |           | 2009 | Antibacterial agent<br>esp. active against                   | 158                         |

|                                  |                            |                                              |                    |      |                                                                                                                                                                                                                                                           |     |
|----------------------------------|----------------------------|----------------------------------------------|--------------------|------|-----------------------------------------------------------------------------------------------------------------------------------------------------------------------------------------------------------------------------------------------------------|-----|
| Butremycin(377)                  | Macrolactam                | <i>Micromonospora</i><br><i>sp. K310</i>     | Marine             | 2014 | mycobacteria.<br>Antibacterial                                                                                                                                                                                                                            | 159 |
| lobosamides A-C<br>(378-380)     | Macrolactam                | <i>Micromonospora</i><br><i>sp.</i>          | Marine             | 2015 | Antiparasitic<br>activity mainly A<br>IC <sub>50</sub> (0.8 μM)                                                                                                                                                                                           | 160 |
| FW05328-1<br>(381)               | Macrolactam<br>(Ansamycin) | <i>Micromonospora</i><br><i>sp. FIM05328</i> | Soil               | 2018 | Antiproliferative<br>IC <sub>50</sub> (0.00020-<br>30.77μM.                                                                                                                                                                                               | 161 |
| Aurodox<br>(382)                 | Macrolactam<br>(Ansamycin) | <i>Micromonospora</i><br><i>sp. FIM05328</i> | Soil               | 2018 | Antiproliferative<br>IC <sub>50</sub> (20.56-83.76<br>μM).                                                                                                                                                                                                | 161 |
| Microansamycins A–I<br>(383-391) | Macrolactam<br>(ansamycin) | <i>Micromonospora</i><br><i>sp.</i>          | -----              | 2018 | Weak antioxidant<br>only compound B<br>with IC <sub>50</sub> 0.85<br>mmol/L.<br>Compounds A-C<br>showed antibacterial<br>activity with MICs<br>0.016- 0.5 μg/mL.<br>Compounds D-F<br>showed moderate<br>antibacterial<br>activity with MICS<br>1-8 μg/mL. | 162 |
| Sporalactam A<br>(392)           | Ansa Macrolide             | <i>Micromonospora</i><br><i>sp.</i>          | marine<br>sediment | 2017 | Antibacterial<br>(0.8-7 μM)).                                                                                                                                                                                                                             | 163 |
| Sporalactam B<br>(393)           | Ansa Macrolide             | <i>Micromonospora</i><br><i>sp.</i>          | marine<br>sediment | 2017 | Antibacterial<br>(0.06 -1.8 μM)).                                                                                                                                                                                                                         | 163 |

|                                                                                                         |                     |                                                          |                 |      |                                                                                          |                               |
|---------------------------------------------------------------------------------------------------------|---------------------|----------------------------------------------------------|-----------------|------|------------------------------------------------------------------------------------------|-------------------------------|
| 3-amino-27-demethoxy-27-hydroxyrifamycin S (394)                                                        | Ansa Macrolide      | <i>Micromonospora sp.</i>                                | marine sediment | 2017 | Antibacterial (0.0001-0.0009μM)                                                          | 163                           |
| 3-amino-rifamycin S (395)                                                                               | Ansa Macrolide      | <i>Micromonospora sp.</i>                                | marine sediment | 2017 | Antibacterial (0.0001-0.0008 μM)                                                         | 163                           |
| Hazimicins (5 and 6) (396,397)                                                                          | Nitriles            | <i>M. echinospora</i> var. <i>challisensis</i> SCC 1411  | Soil            | 1983 | Antibacterial<br>Antifungal                                                              | 164                           |
| Antibiotic Y 03559J-A (398)                                                                             | Isonitrile          | <i>Micromonospora sp.</i> Y-03559J                       | Soil            | 1995 | Antibacterial                                                                            | Japan. Pat., 1995, 95 02 821. |
| YM-47515 (399)                                                                                          | Isonitrile compound | <i>M. echinospora</i> subsp. <i>echinospora</i> Y-03559J | Soil            | 1997 | Antibacterial activity<br>Against gram positive bacteria<br>zone of inhibition (17-36mm) | 165                           |
| Retymicin (400)                                                                                         | Xanthone            | <i>Micromonospora sp.</i> Tü 6368                        | Soil            | 2005 | Cytostatic activity < 1μg/ml.                                                            | 134                           |
| MDN-0185 (401)                                                                                          | Polycyclic Xanthone | <i>Micromonospora sp.</i> CA-256353                      | -----           | 2018 | Antiplasmodial IC50 ( 9 Nm ).                                                            | 166                           |
| Mycinonic acid III (402)                                                                                | Fatty acid          | <i>M. griseorubida</i>                                   | Soil            | 1991 | Proposed biosynth. intermed. of mycinamycins                                             | 167                           |
| Epimycinonic acid I (403)                                                                               | Fatty acid          | <i>M. griseorubida</i>                                   | Soil            | 1991 | Proposed biosynth. intermed. of mycinamycins                                             | 167                           |
| Mycinonic acid I<br>Mycinonic acid II.<br>Mycinonic acid IV<br>Decarboxymycinonic acid III<br>(404-407) | Fatty acid          | <i>M. griseorubida</i>                                   | Soil            | 1991 | Proposed biosynth. intermed. of mycinamycins                                             | 167                           |

|                                                                                    |                               |                                                            |      |      |                                                                                                                                                                                                 |                               |
|------------------------------------------------------------------------------------|-------------------------------|------------------------------------------------------------|------|------|-------------------------------------------------------------------------------------------------------------------------------------------------------------------------------------------------|-------------------------------|
| 3,15-Dihydroxy-4,6,8,14-tetramethyl-5,9-dioxo-10,12-heptadecadienoic acid<br>(408) | Fatty acid                    | <i>M. griseorubida</i>                                     | Soil | 1992 | NA                                                                                                                                                                                              | 168                           |
| Saquayamycin Z<br>(409)                                                            | Saquayamycin                  | <i>Micromonospora</i><br><i>sp.</i> Tü 6368                | Soil | 2005 | Cytostatic activity<br>< 1 µg/ml.                                                                                                                                                               | 134                           |
| Psicofuranine<br>(410)                                                             | Nucleoside-type<br>antibiotic | <i>M. echinospora</i>                                      | Soil | 1959 | Antitumour and<br>antibacterial                                                                                                                                                                 | 169                           |
| 7-Deazainosine<br>(411)                                                            | Nucleoside antibiotic.        | <i>M. chalcea</i>                                          | Soil | 1970 | Cytotoxic                                                                                                                                                                                       | Japan. Pat., 1970,<br>20 559. |
| 5,6-Dihydro-5-azathymidine<br>(412)                                                | Nucleoside antibiotic         | <i>M. melanogenes</i>                                      | Soil | 1975 | Antibacterial<br>Antiviral                                                                                                                                                                      | US Pat., 1975, 3<br>907 643.  |
| Dapiramycin A<br>(413)                                                             | Ribonucleoside                | <i>Micromonospora</i><br><i>sp.</i> SF-1917                | Soil | 1983 | Antifungal<br>Effective against<br>sheath blight in<br>rice plants caused<br>by <i>Rhizoctonia</i><br><i>solani</i> , and against<br><i>Colletotrichum</i><br><i>lagenarium</i> on<br>cucumbers | 170                           |
| Epidapiramycin A<br>(414)                                                          | Ribonucleoside                | <i>Micromonospora</i><br><i>sp.</i>                        | Soil | 1984 | Shows activity<br>against sheath<br>blight in rice<br>plants. Less<br>effective than<br>Dapiramycin A                                                                                           | 171                           |
| Sch 40832<br>(415)                                                                 | Thiostrepton                  | <i>M. carbonacea</i> var.<br><i>africana</i><br>ATCC 39149 | Soil | 1998 | Antibacterial<br>activity                                                                                                                                                                       | 97                            |



|                                                                                   |                              |                                                   |                                   |      |                                                                                                           |     |
|-----------------------------------------------------------------------------------|------------------------------|---------------------------------------------------|-----------------------------------|------|-----------------------------------------------------------------------------------------------------------|-----|
| Streptimidone Ao58A<br>(416)                                                      | Glutarimide                  | <i>M. coerulea</i> Ao58                           | Sea-mud soil                      | 1999 | Antifungal activity<br>MIC (3-10µg/ml).                                                                   | 172 |
| Maklamicin<br>(417)                                                               | Spirotetronate<br>polyketide | <i>Micromonospora</i><br><i>sp.</i> GMKU326       | Root of a<br>leguminous<br>plant. | 2011 | Antibacterial MIC<br>(0.2-13µg/ml)                                                                        | 173 |
| Neomacquarimicin<br>(418)                                                         | Carbocyclic<br>polyketide    | <i>Micromonospora</i><br><i>sp.</i><br>NPS2077    | Marine<br>sponge                  | 2014 | Anticancer IC <sub>50</sub><br>(17-34 µM)                                                                 | 174 |
| MBJ-0003<br>(419)                                                                 | Hydroxamate<br>metabolite    | <i>Micromonospora</i><br><i>sp.</i> 29867         | Shellfish,<br>Marine              | 2014 | Cytotoxic IC <sub>50</sub><br>(11µM)                                                                      | 175 |
| 7-Acetyl-3, 6-dihydroxy-<br>8-<br>methyl-1-tetralone.<br>GTRI 02. L-form<br>(420) | -----                        | <i>Micromonospora</i><br><i>sp.</i> SA246         | Soil                              | 1998 | Lipid peroxidation<br>inhibitor IC <sub>50</sub><br>1.89 µg/ml.                                           | 176 |
| Naphthalenepropanoic<br>acid<br>(421)                                             | -----                        | <i>Micromonospora</i><br><i>sp.</i> HS-HM-036     | Muddy sea<br>sediments            | 2016 | Anticancer<br>IC <sub>50</sub> (46.5 µg/ml).<br>Antibacterial<br>activity<br>MICS (0.016<br>and 8 mg/ml). | 177 |
| Serine alkaline proteases<br>(422)                                                | Enzymes                      | <i>M.</i><br><i>chaiyaphumensis</i><br>S103       | Sfax solar<br>saltern .           | 2017 | Deproteinization<br>of<br>shrimp waste.<br>Detergent                                                      | 178 |
| 2- phenylacetic acid<br>(423)                                                     | Aromatic acid                | <i>Micromonospora</i><br><i>sp.</i> (strain G044) | sponge                            | 2017 | -----                                                                                                     | 101 |

|                                                                                                                                                 |                              |                                          |        |      |                                                                                                                                                                            |                                  |
|-------------------------------------------------------------------------------------------------------------------------------------------------|------------------------------|------------------------------------------|--------|------|----------------------------------------------------------------------------------------------------------------------------------------------------------------------------|----------------------------------|
| Diacidene<br>(424)                                                                                                                              | Polyene Dicarboxylic<br>Acid | Micromonospora<br>coxensis MTCC<br>8093  | Marine | 2012 | -----                                                                                                                                                                      | 180                              |
| Antibiotic XK 206<br>(425)                                                                                                                      | -----                        | <i>Micromonospora sp</i>                 | Soil   | 1980 | Weak antibacterial                                                                                                                                                         | Japan. Pat., 1980,<br>80 15 409. |
| Deoxydehydrochorismic<br>acid<br>3-(1<br>Carboxyvinylloxy)benzoic<br>acid (426)                                                                 | Aromatic acid                | <i>M. coxensis</i>                       | Marine | 2012 | NA                                                                                                                                                                         | 180                              |
| Glutamine scyllo-inositol<br>transaminase<br>(427)                                                                                              | Aminotransferase<br>enzyme   | <i>M. purpure</i>                        | Soil   | 1989 | Catalyses the<br>reaction of L-<br>glutamine with<br>2,4,6/3,5-<br>pentahydroxycyclo<br>hexanone to give<br>2-oxoglutaramate<br>and 1-amino-1-<br>deoxy-scyllo-<br>inosito | 181                              |
| Glyphomicin (428)                                                                                                                               | Phosphoglycolipid            | <i>Micromonospora<br/>sp. ATCC 53481</i> | Soil   | 1989 | Antibacterial                                                                                                                                                              | US Pat.,1989,4,842<br>857<br>182 |
| M GCI (429)                                                                                                                                     | Glycoprotein                 | <i>Micromonospora<br/>sp. BR-1613</i>    | Soil   | 1984 | $\beta$ -Glucuronidase<br>inhibitor                                                                                                                                        | 183                              |
| Isopimara-2-one-3-ol-<br>8,15-diene(430)                                                                                                        | Diterpene                    | <i>Micromonospora<br/>sp.</i>            | Marine | 2015 | -----                                                                                                                                                                      | 117                              |
| Micromonohalimananes A<br>(431) and B (432)                                                                                                     | Diterpene                    | Micromonospora<br>sp.                    | Marine |      | Antibacterial                                                                                                                                                              | 184                              |
| Daidzein-40-(2-deoxy- $\alpha$ -<br>l-fucopyranoside)(433)<br>Daidzein-7-(2-deoxy- $\alpha$ -l-<br>fucopyranoside)(434)<br>Daidzein-40,7-di-(2- | Isoflavonoid                 | <i>M. aurantiaca 110B</i>                | Soil   | 2019 | Moderate<br>cytotoxic activity                                                                                                                                             | 185                              |

|                                                        |                   |                                         |        |      |                                                              |     |
|--------------------------------------------------------|-------------------|-----------------------------------------|--------|------|--------------------------------------------------------------|-----|
| deoxy- $\alpha$ -l-fucopyranoside)(435)                |                   |                                         |        |      |                                                              |     |
| Dimethyl phenazine-1,6-dicarboxylate (436)             | Alkaloids         | Micromonospora sp<br>UR 56              | Marine | 2020 | Antibacterial, antibiofilm and moderate cytotoxic activity   | 186 |
| phenazine-1,6-dicarboxylic acid mono methyl ester(437) |                   |                                         |        |      |                                                              |     |
| Phenazine-1-carboxylic acid; tubermycin(438)           |                   |                                         |        |      |                                                              |     |
| N-(2-hydroxyphenyl)-acetamide(439)                     | Aromatic acid     | <i>Micromonospora</i> sp<br>UR 56       | Marine | 2020 | Cytotoxic                                                    | 186 |
| <i>p</i> -anisamide(440)                               | Aromatic acid     | <i>Micromonospora</i> sp<br>UR 56       | Marine | 2020 | Antibacterial, antibiofilm and moderate cytotoxic activities | 186 |
| <i>Paulomycin G</i> (441)                              | <i>Paulomycin</i> | <i>M. matsumotoense</i><br><i>M-412</i> | Marine | 2017 | Antibacterial and cytotoxic activities                       | 187 |

---

### References:

- 1 T. H. Haskell, J. C. French and Q. R. Bartz, *J. Am. Chem. Soc.*, 1959, **81**, 3480–3481.
- 2 G. M. Luedemann and B. C. Brodsky, *Antimicrob. Agents Chemother*, 1964, **1963**, 116–124.
- 3 Google Patents, US Patent, 3,454,696, 1969.
- 4 M. J. Weinstein, J. A. Marquez, R. T. Testa, G. H. Wagman, E. M. Oden and J. A. Waitz, *J. Antibiot. (Tokyo)*, 1970, **23**, 551–554.
- 5 J. Berdy, J. K. Pauncz, Z. M. Vajna, G. Horvath, J. Gyimesi and I. Koczka, *J. Antibiot. (Tokyo)*, 1977, **30**, 945–954.
- 6 G. H. Wagman, J. A. Marquez, P. D. Watkins, J. V Bailey, F. Gentile and M. J. Weinstein, *J. Antibiot. (Tokyo)*, 1973, **26**, 732–736.
- 7 G. H. Wagman, R. T. Testa, J. A. Marquez and M. J. Weinstein, *Antimicrob. Agents Chemother.*, 1974, **6**, 144–149.
- 8 B. K. Lee, R. G. Condon, G. H. Wagman and E. Katz, *Antimicrob. Agents Chemother.*, 1976, **9**, 151–159.
- 9 R. T. Testa, G. H. Wagman, P. J. L. Daniels and M. J. Weinstein, *J. Antibiot. (Tokyo)*, 1974, **27**, 917–921.
- 10 R. Okachi, I. Kawamoto, S. Takasawa, M. Yamamoto, S. Sato, T. Sato and T. Nara, *J. Antibiot. (Tokyo)*, 1974, **27**, 793–800.
- 11 M. J. Weinstein, G. H. Wagman, J. A. Marquez, R. T. Testa and J. A. Waitz, *Antimicrob. Agents Chemother.*, 1975, **7**, 246–249.

- 12 P. J. L. Daniels, C. Luce, T. L. Nagabhushan, R. S. Jaret, D. Schumacher, H. Reimann and J. a n Ilavsky, *J. Antibiot. (Tokyo)*., 1975, **28**, 35–41.
- 13 J. A. Marquez, G. H. Wagman, R. T. Testa, J. A. WALTZ and M. J. Weinstein, *J. Antibiot. (Tokyo)*., 1976, **29**, 483–487.
- 14 B. K. Lee, R. G. Condon, G. H. Wagman and M. J. Weinstein, *J. Antibiot. (Tokyo)*., 1976, **29**, 677–684.
- 15 M. Shimura, Y. Sekizawa, K. Iinuma, H. Naganawa and S. Kondo, *Agric. Biol. Chem.*, 1976, **40**, 611–618.
- 16 T. Nara, M. Yamamoto, I. Kawamoto, K. Takayama, R. y o Okachi, S. Takasawa, T. Sato and S. Sato, *J. Antibiot. (Tokyo)*., 1977, **30**, 533–540.
- 17 D. H. Davies, D. Greeves, A. K. Mallams, J. B. Morton and R. W. Tkach, *J. Chem. Soc. Perkin Trans. 1*, 1975, 814–818.
- 18 M. Kugelman, R. S. Jaret and S. Mittelman, *J. Antibiot. (Tokyo)*., 1978, **31**, 643–645.
- 19 M. Sugimoto, S. Ishii, R. Y. O. Okachi and T. Nara, *J. Antibiot. (Tokyo)*., 1979, **32**, 868–873.
- 20 H. Maehr, C.-M. Liu, T. Hermann, B. L. A. T. PROSSER, J. M. SMALLHEER and N. J. PALLERONI, *J. Antibiot. (Tokyo)*., 1980, **33**, 1431–1436.
- 21 Google Patents, United States patent US 4,187,299, 1980.
- 22 Google Patents, U.S. Patent 4,214,080, 1980.
- 23 Google Patents, US Pat., 4 214 080, 1980.
- 24 Google Patents, U.S. Patent 4,219,644., 1980.
- 25 J. R. Martin, P. Johnson, J. Tadanier and A. Goldstein, *Antimicrob. Agents Chemother.*, 1980, **18**, 761–765.
- 26 K. Shirahata, T. Iida, M. Sato and K. Mochida, *Carbohydr. Res.*, 1981, **92**, 168–175.
- 27 K. Shirahata, H. Kase, S. Kitamura and T. Iida, *J. Antibiot. (Tokyo)*., 1982, **35**, 520–523.
- 28 S. Kitamura, H. Kase, Y. Odakura, T. Iida, K. Shirahata and K. Nakayama, *J. Antibiot. (Tokyo)*., 1982, **35**, 94–97.
- 29 H. Kase, G. Shimura, T. Iida and K. Nakayama, *Agric. Biol. Chem.*, 1982, **46**, 515–522.
- 30 Y. Odakura, H. Kase, S. Itoh, S. Satoh, S. Takasawa, K. Takahashi, K. Shirahata and K. Nakayama, *J. Antibiot. (Tokyo)*., 1984, **37**, 1670–1680.
- 31 S. Itoh, Y. Odakura, H. Kase, S. Satoh, K. Takahashi, T. Iida, K. Shirahata and K. Nakayama, *J. Antibiot. (Tokyo)*., 1984, **37**, 1664–1669.
- 32 J. P. Zhu, Y. F. Ni and L. Z. Xu, *Wei Sheng Wu Xue Bao*, 1987, **27**, 181–185.
- 33 M. a y d Lee, J. K. Manning, D. R. Williams, N. A. Kuck, R. T. Testa and D. B. Borders, *J. Antibiot. (Tokyo)*., 1989, **42**, 1070–1087.
- 34 M. Chu, R. Mierzwa, J. Jenkins, T.-M. Chan, P. Das, B. Pramanik, M. Patel and V. Gullo, *J. Nat. Prod.*, 2002, **65**, 1588–1593.

- 35 I. Schneemann, K. Nagel, I. Kajahn, A. Labes, J. Wiese and J. F. Imhoff, *Appl. Environ. Microbiol.*, 2010, **76**, 3702–3714.
- 36 T. Vályi-Nagy, J. Úri and I. Szilágyi, *Nature*, 1954, **174**, 1105.
- 37 J. Marquez, A. MURAWSKI, G. H. WAGMAN, R. S. JARET and H. REIMANN, *J. Antibiot. (Tokyo)*., 1969, **22**, 259–264.
- 38 J. A. Waitz, C. G. Drube, E. L. MOSS and M. J. WEINSTEIN, *J. Antibiot. (Tokyo)*., 1972, **25**, 647–652.
- 39 I. Kawamoto, R. Y. O. OKACHI, H. KATO, S. YAMAMOTO, I. TAKAHASHI, S. TAKASAWA and T. NARA, *J. Antibiot. (Tokyo)*., 1974, **27**, 493–501.
- 40 K. Hatano, E. Higashide and M. Shibata, *J. Antibiot. (Tokyo)*., 1976, **29**, 1163–1170.
- 41 T. Kishi, S. Harada, H. Yamana and A. Miyake, *J. Antibiot. (Tokyo)*., 1976, **29**, 1171–1181.
- 42 T. Furumai, I. Maezawa, N. Matsuzawa, S. Yano, T. Yamaguchi, K. Takeda and T. Okuda, *J. Antibiot. (Tokyo)*., 1977, **30**, 443–449.
- 43 T. Yamaguchi, H. Hayasaka, H. Yoshida, T. Matsushita, A. Yamabe and S. Ohshima, *J. Antibiot. (Tokyo)*., 1978, **31**, 433–440.
- 44 K. Kobinata, M. Uramoto, T. Mizuno and K. Isono, *J. Antibiot. (Tokyo)*., 1980, **33**, 772–775.
- 45 S. Satoi, N. Muto, M. Hayashi, T. Fujii and M. Otani, *J. Antibiot. (Tokyo)*., 1980, **33**, 364–376.
- 46 S. Omura, C. Kitao and H. Matsubara, *Chem. Pharm. Bull.*, 1980, **28**, 1963–1965.
- 47 R. W. Vaughan, J. Lotvin, M. S. Puar, M. Patel, A. Kershner, M. G. Kalyanpur, J. Marquez and J. A. Waitz, *J. Antibiot. (Tokyo)*., 1982, **35**, 251–253.
- 48 E. Martinelli, L. Faniuolo, G. Tuan, G. G. Gallo and B. Cavalleri, *J. Antibiot. (Tokyo)*., 1983, **36**, 1312–1322.
- 49 N. Sadakane, Y. Tanaka and S. Omura, *J. Antibiot. (Tokyo)*., 1983, **36**, 921–922.
- 50 T. Takatsu, H. Nakayama, A. Shimazu, K. Furihata, K. Ikeda, K. Furihata, H. Seto and N. Otake, *J. Antibiot. (Tokyo)*., 1985, **38**, 1806–1809.
- 51 H. Achenbach, A. Mühlenfeld, U. Fauth and H. Zähler, *Tetrahedron Lett.*, 1985, **26**, 6167–6170.
- 52 Y. Takahashi, Y. Iwai and S. Omura, *J. Antibiot. (Tokyo)*., 1986, **39**, 1413–1418.
- 53 H. Nakayama, T. Hanamura, Y. Abe, a Shimazu, K. Furihata, K. Ikeda, K. Furihata, H. Seto and N. Otake, *J. Antibiot. (Tokyo)*., 1986, **39**, 1016–1020.
- 54 B. Cavalleri, A. Arnone, E. Di Modugno, G. Nasini and B. P. Goldstein, *J. Antibiot. (Tokyo)*., 1988, **41**, 308–315.
- 55 H. Imai, K. Suzuki, M. Morioka, T. Sasaki, K. Tanaka, S. Kadota, M. Iwanami, T. Saito and H. Eiki, *J. Antibiot. (Tokyo)*., 1989, **42**, 1000–1002.
- 56 S. Nakajima, K. Kojiri, H. Morishima and M. Okanishi, *J. Antibiot. (Tokyo)*., 1990, **43**, 1006–1009.
- 57 M. S. Puar and D. Schumacher, *J. Antibiot. (Tokyo)*., 1990, **43**, 1497–1501.

- 58 K. Funaishi, K. Kawamura, F. Satoh, M. Hiramatsu, M. Hagiwara and M. Okanish, *J. Antibiot. (Tokyo)*., 1990, **43**, 938–947.
- 59 K. Kinoshita, S. Takenaka and M. Hayashi, Mitsuo Kinoshita, K., Takenaka, S., Suzuki, H., Morohoshi, T., & Hayashi, *J. Antibiot. (Tokyo)*., 1991, **44**, 1270–1273.
- 60 K. W. Shimotohno, T. Endo and K. Furihata, *J. Antibiot. (Tokyo)*., 1993, **46**, 682–684.
- 61 Y. Hayakawa, K. Shin-Ya, K. Furihata and H. Seto, *J. Antibiot. (Tokyo)*., 1993, **46**, 1563–1569.
- 62 K. Yasumuro, M. Shibazaki, T. Sasaki, H. Imai, H. Yamaguchi, K. Suzuki, M. Morioka and Y. Takebayasi, *J. Antibiot. (Tokyo)*., 1994, **47**, 250–252.
- 63 Z. Hepin and G. Juefen, *Pharm. Biotechnol.*, 1994, 1.
- 64 K. S. Lam, G. A. Hesler, D. R. Gustavson, R. L. Berry, K. Tomita, J. L. MacBeth, J. Ross, D. MILLER and S. FORENZA, *J. Antibiot. (Tokyo)*., 1996, **49**, 860–864.
- 65 D. R. Schroeder, K. L. Colson, S. E. Klohr, M. S. Lee, J. A. Matson, L. S. Brinen and J. Clardy, *J. Antibiot. (Tokyo)*., 1996, **49**, 865–872.
- 66 G. H. Harris, A. Shafiee, M. A. Cabello, J. E. Curotto, O. Genilloud, K. E. Göklen, M. B. Kurtz, M. Rosenbach, P. M. Salmon and R. A. Thornton, *J. Antibiot. (Tokyo)*., 1998, **51**, 837–844.
- 67 L. M. Canedo, J. L. F. Puentes, J. P. Baz, X. H. Huang and K. L. Rinehart, *J. Antibiot. (Tokyo)*., 2000, **53**, 479–483.
- 68 V. R. Hegde, M. S. Puar, P. Dai, M. Patel, V. P. Gullo, P. R. Das, R. W. Bond and A. T. McPhail, *Tetrahedron Lett.*, 2000, **41**, 1351–1354.
- 69 E. Ohta, N. K. Kubota, S. Ohta, M. Suzuki, T. Ogawa, A. Yamasaki and S. Ikegami, *Tetrahedron*, 2001, **57**, 8463–8467.
- 70 J. A. Laakso, U. M. Mocek, J. Van Dun, W. Wouters and M. Janicot, *J. Antibiot. (Tokyo)*., 2003, **56**, 909–916.
- 71 C. Thawai, P. Kittakoop, S. Tanasupawat, K. Suwanborirux, K. Sriklung and Y. Thebtaranonth, *Chem. Biodivers.*, 2004, **1**, 640–645.
- 72 Y. Anzai, Y. Iizaka, W. Li, N. Idemoto, S. Tsukada, K. Koike, K. Kinoshita and F. Kato, *J. Ind. Microbiol. Biotechnol.*, 2009, **36**, 1013.
- 73 Y. Anzai, A. Sakai, W. Li, Y. Iizaka, K. Koike, K. Kinoshita and F. Kato, *J. Antibiot. (Tokyo)*., 2010, **63**, 325.
- 74 A. Gärtner, B. Ohlendorf, D. Schulz, H. Zinecker, J. Wiese and J. F. Imhoff, *Mar. Drugs*, 2011, **9**, 98–108.
- 75 S. Carlson, L. Marler, S.-J. Nam, B. Santarsiero, J. Pezzuto and B. Murphy, *Mar. Drugs*, 2013, **11**, 1152–1161.
- 76 P. Fei, W. Chuan-xi, X. Yang, J. Hong-lei, C. Lu-jie, P. Uribe, A. T. Bull, M. Goodfellow, J. Hong and L. Yun-yang, *Nat. Prod. Res.*, 2013, **27**, 1366–1371.
- 77 E. J. Skellam, A. K. Stewart, W. K. Strangman and J. L. C. Wright, *J. Antibiot. (Tokyo)*., 2013, **66**, 431.
- 78 M. C. Kim, H. Machado, K. H. Jang, L. Trzoss, P. R. Jensen and W. Fenical, *J. Am. Chem. Soc.*, 2018, **140**, 10775–10784.
- 79 K. Kobinata, M. Uramoto, T. Mizuno and K. Isono, *J. Antibiot. (Tokyo)*., 1980, **33**, 244–246.

- 80 F. Tomita, T. Tamaoki, K. Shirahata, M. Kasai, M. Morimoto, S. Ohkubo, K. Mineura and S. Ishii, *J. Antibiot. (Tokyo)*., 1980, **33**, 668–670.
- 81 T. Tamaoki, M. Kasai, K. Shirahata and F. Tomita, *J. Antibiot. (Tokyo)*., 1982, **35**, 979–984.
- 82 Y. Igarashi, K. Takagi, Y. Kan, K. Fujii, K.-I. HARADA, T. Furumai and T. Oki, *J. Antibiot. (Tokyo)*., 2000, **53**, 233–240.
- 83 C. Gui, S. Zhang, X. Zhu, W. Ding, H. Huang, Y.-C. Gu, Y. Duan and J. Ju, *J. Nat. Prod.*, 2017, **80**, 1594–1603.
- 84 W. P. Fisher, J. Charney and W. A. Bolhofer, *Antibiot. Chemother. (Northfield, Ill.)*, 1951, **1**, 571–572.
- 85 S. Nakamura, N. Tanaka and H. Umezawa, *J. Antibiot. (Tokyo)*., 1966, **19**, 10–12.
- 86 Google Patents, U.S. Patent 4,078,056, 1978.
- 87 H. Maehr, J. Smallheer, M. Chin, N. Palleroni, F. Weiss and C.-M. Liu, *J. Antibiot. (Tokyo)*., 1979, **32**, 531–532.
- 88 Y. Kawamura, Y. Yasuda and M. Mayama, *J. Antibiot. (Tokyo)*., 1981, **34**, 367–369.
- 89 J.-I. Shoji, H. Hinoo, T. Kato, K. Nakauchi, S. Matsuura, M. Mayama, Y. Yasuda and Y. Kawamura, *J. Antibiot. (Tokyo)*., 1981, **34**, 374–380.
- 90 Google Patents, U.S. Patent 4,692,333., 1987.
- 91 Google Patents, U.S. Patent 4,478,831., 1984.
- 92 T. Okazaki, R. Enokita, H. Miyaoka, T. Takatsu and A. Torikata, *J. Antibiot. (Tokyo)*., 1987, **40**, 917–923.
- 93 R. Cooper, A. N. N. C. Horan, F. Gentile, V. Gullo, D. Loebenberg, J. Marquez, M. Patel, M. S. Puar and I. Truumees, *J. Antibiot. (Tokyo)*., 1988, **41**, 13–19.
- 94 K. S. Lam, D. R. Gustavson, G. A. Hesler, T. T. Dabrah, J. A. Matson, R. L. Berry, W. C. Rose and S. Forenza, *J. Ind. Microbiol.*, 1995, **15**, 60–65.
- 95 K. D. McBrien, R. L. Berry, S. E. Lowe, K. M. Neddermann, I. Bursuker, S. Huang, S. E. Klohr and J. E. Leet, *J. Antibiot. (Tokyo)*., 1995, **48**, 1446–1452.
- 96 J. P. Baz, L. M. Canedo, J. L. F. Puentes and M. V. S. ELIPE, *J. Antibiot. (Tokyo)*., 1997, **50**, 738–741.
- 97 M. S. Puar, T. M. Chan, V. Hegde, M. Patel, P. Bartner, K. J. Ng, B. N. Pramanik and R. D. MacFarlane, *J. Antibiot. (Tokyo)*., 1998, **51**, 221–224.
- 98 A. K. Saksena, E. Jao, B. Murphy, D. Schumacher, T.-M. Chan, M. S. Puar, J. K. Jenkins, D. Maloney, M. Cordero and B. N. Pramanik, *Tetrahedron Lett.*, 1998, **39**, 8441–8444.
- 99 H. Lackner, I. Bahner, N. Shigematsu, L. K. Pannell and A. B. Mauger, *J. Nat. Prod.*, 2000, **63**, 352–356.
- 100 M. S. V. Gurovic, S. Müller, N. Domin, I. Seccareccia, S. Nietzsche, K. Martin and M. Nett, *Int. J. Syst. Evol. Microbiol.*, 2013, **63**, 3812–3817.
- 101 C. D. Tuan, D. T. M. Huong, T. B. Ngan, V. T. Quyen, M. Brian, C. Van Minh and P. Van Cuong, *Vietnam J. Sci. Technol.*, 2017, **55**, 251.

- 102 L. Chen, W. Zhao, H.-L. Jiang, J. Zhou, X.-M. Chen, Y.-Y. Lian, H. Jiang and F. Lin, *Tetrahedron*, 2018, **74**, 4151–4154.
- 103 W.-C. Liu, G. Astle, E. S. Wells Jr, W. H. Trejo, P. A. Principe, M. L. Rathnum, W. L. Parker, O. R. Kocy and R. B. Sykes, *J. Antibiot. (Tokyo)*, 1980, **33**, 1256–1261.
- 104 Y. Ikeda, S. Kondo, T. Sawa, M. Tsuchiya, D. Ikeda, M. Hamada, T. Takeuchi and H. Umezawa, *J. Antibiot. (Tokyo)*, 1981, **34**, 1628–1630.
- 105 T. Fehr, J.-J. Sanglier, W. Schuler, L. Gschwind, M. PONELLE, W. SCHILLING and C. WLOLAND, *J. Antibiot. (Tokyo)*, 1996, **49**, 230–233.
- 106 K. Tani, Y. ARAI and T. YAMAGUCHI, *J. Antibiot. (Tokyo)*, 1982, **35**, 1441–1447.
- 107 R. A. Nelson, J. A. Pope Jr, G. M. Luedemann, L. E. Mcdaniel and C. P. Schaffner, *J. Antibiot. (Tokyo)*, 1986, **39**, 335–344.
- 108 W. L. Russell, R. C. Pandey, C. P. Schaffner and H. M. Fales, *J. Antibiot. (Tokyo)*, 1988, **41**, 149–156.
- 109 W.-H. Yeo, B.-S. Yun, N.-I. Back, Y.-H. Kim, S.-S. Kim, E.-K. Park, K.-S. Whang and Y. u Seung-Hun, *J. Antibiot. (Tokyo)*, 1997, **50**, 546–550.
- 110 T. da S. Sousa, P. C. Jimenez, E. G. Ferreira, E. R. Silveira, R. Braz-Filho, O. D. L. Pessoa and L. V Costa-Lotufo, *J. Nat. Prod.*, 2012, **75**, 489–493.
- 111 Y. Matsuda, K. Asano, I. Kawamoto and H. Kase, *J. Antibiot. (Tokyo)*, 1987, **40**, 1092–1100.
- 112 G. U. Y. T. Carter, J. A. Nietzsche, D. R. Williams and D. B. Borders, *J. Antibiot. (Tokyo)*, 1990, **43**, 504–512.
- 113 W.-H. Yeo, B.-S. Yun, Y.-S. Kim, S. H. Yu, H.-M. Kim, I.-D. Yoo and Y. H. Kim, *J. Antibiot. (Tokyo)*, 2002, **55**, 511–515.
- 114 H. Wang, S. L. Yeo, J. Xu, X. Xu, H. He, F. Ronca, A. E. Ting, Y. Wang, V. C. Yu and M. M. Sim, *J. Nat. Prod.*, 2002, **65**, 721–724.
- 115 T. Furumai, Y. Igarashi, H. Higuchi, N. Saito and T. Oki, *J. Antibiot. (Tokyo)*, 2002, **55**, 128–133.
- 116 W. Zhang, Z. Liu, S. Li, Y. Lu, Y. Chen, H. Zhang, G. Zhang, Y. Zhu, G. Zhang and W. Zhang, *J. Nat. Prod.*, 2012, **75**, 1937–1943.
- 117 M. W. Mullooney, E. Hainmhire, U. Tanouye, J. E. Burdette, C. Van Pham and B. T. Murphy, *Mar. Drugs*, 2015, **13**, 5815–5827.
- 118 A. Ismet, S. Vikineswary, S. Paramaswari, W. H. Wong, A. Ward, T. Seki, H. P. Fiedler and M. Goodfellow, *World J. Microbiol. Biotechnol.*, 2004, **20**, 523–528.
- 119 M. Konishi, H. Ohkuma, K. Matsumoto, T. Tsuno, H. Kamei, T. Miyaki, T. Oki, H. Kawaguchi, G. D. Vanduyne and J. O. N. Clardy, *J. Antibiot. (Tokyo)*, 1989, **42**, 1449–1452.
- 120 K. Shiomi, H. Iinuma, H. Naganawa, M. Hamada, S. Hattori, H. Nakamura, T. Takeuchi and Y. Iitaka, *J. Antibiot. (Tokyo)*, 1990, **43**, 1000–1005.
- 121 M. Konishi, H. Ohkuma, K. Matsumoto, K. Saitoh, T. Miyaki, T. Oki and H. Kawaguchi, *J. Antibiot. (Tokyo)*, 1991, **44**, 1300–1305.



- 122 M. Miyoshi-Saitoh, N. Morisaki, Y. Tokiwa, S. Iwasaki, M. Konishi, K. Saitoh and T. Oki, *J. Antibiot. (Tokyo)*, 1991, **44**, 1037–1044.
- 123 Y. Igarashi, M. E. Trujillo, E. Martínez-Molina, S. Yanase, S. Miyanaga, T. Obata, H. Sakurai, I. Saiki, T. Fujita and T. Furumai, *Bioorg. Med. Chem. Lett.*, 2007, **17**, 3702–3705.
- 124 C.-M. Xue, L. Tian, W.-H. Lin and Z.-W. Deng, *Nat. Prod. Res.*, 2009, **23**, 533–538.
- 125 Y. Igarashi, S. Yanase, K. Sugimoto, M. Enomoto, S. Miyanaga, M. E. Trujillo, I. Saiki and S. Kuwahara, *J. Nat. Prod.*, 2011, **74**, 862–865.
- 126 T. D. S. Sousa, P. C. Jimenez, E. G. Ferreira, E. R. Silveira, R. Braz-Filho, O. D. L. Pessoa and L. V. Costa-Lotufo, *J. Nat. Prod.*, 2012, **75**, 489–493.
- 127 K. Aiso, T. Arai, I. Shidara and K. Ogi, *J. Antibiot. (Tokyo)*, 1954, **7**, 1–6.
- 128 G. Cassinelli, F. Di Matteo, S. Forenza, M. C. Ripamonti, G. Rivola, F. Arcamone, A. Di Marco, A. M. Casazza, C. Soranzo and G. Pratesi, *J. Antibiot. (Tokyo)*, 1980, **33**, 1468–1473.
- 129 T. P. Tully, 1987, **48**, 652–653.
- 130 M. G. Nair, S. K. Mishra, A. R. Putnam and R. C. Pahdey, *J. Antibiot. (Tokyo)*, 1992, **45**, 1738–1745.
- 131 K. Ishigami, Y. Hayakawa and H. Seto, *J. Antibiot. (Tokyo)*, 1994, **47**, 1219–1225.
- 132 S.-W. Yang, T.-M. Chan, J. Terracciano, R. Patel, D. Loebenberg, G. Chen, M. Patel, V. Gullo, B. Pramanik and M. Chu, *J. Antibiot. (Tokyo)*, 2004, **57**, 601–604.
- 133 N. Adnani, M. G. Chevrette, S. N. Adibhatla, F. Zhang, Q. Yu, D. R. Braun, J. Nelson, S. W. Simpkins, B. R. McDonald and C. L. Myers, *ACS Chem. Biol.*, 2017, **12**, 3093–3102.
- 134 N. Antal, H.-P. Fiedler, E. Stackebrandt, W. Beil, K. Ströch and A. Zeeck, *J. Antibiot. (Tokyo)*, 2005, **58**, 95.
- 135 H. He, H. Y. Yang, S. W. Luckman, V. S. Bernan, G. Tsai, D. M. Roll and G. T. Carter, *Helv. Chim. Acta*, 2004, **87**, 1385–1391.
- 136 A. H. Banskota, M. Aouidate, D. Sørensen, A. Ibrahim, M. Pirae, E. Zazopoulos, A.-M. Alarco, H. Gourdeau, C. Mellon and C. M. Farnet, *J. Antibiot. (Tokyo)*, 2009, **62**, 565.
- 137 M. J. Weinstein, G. M. Luedemann, E. M. Oden and G. H. Wagman, *Antimicrob. Agents Chemother.*, 1964, **10**, 24–32.
- 138 D. R. Foster and M. J. Rybak, *Pharmacother. J. Hum. Pharmacol. Drug Ther.*, 1999, **19**, 1111–1117.
- 139 M. Chu, R. Mierzwa, M. Patel, J. Jenkins, P. Das, B. Pramanik and T.-M. Chan, *Tetrahedron Lett.*, 2000, **41**, 6689–6693.
- 140 O. Ando, H. Satake, K. Itoi, A. Sato, M. Nakajima, S. Takahashi, H. Haruyama, Y. Ohkuma, T. Kinoshita and R. Enokita, *J. Antibiot. (Tokyo)*, 1991, **44**, 1165–1168.
- 141 J. Itoh, H.-O. Watabe, S. Ishii, S. Gomi, M. Nagasawa, H. Yamamoto, T. Shomura, M. Sezaki and S. Konodo, *J. Antibiot. (Tokyo)*, 1988, **41**, 1281–1284.
- 142 Google Patents, United States patent 5,541,181, 1996.

- 143 L.-M. Yang, W. Rong-Yang, A. T. Mcphail, T. Yokoi and K.-H. Lee, *J. Antibiot. (Tokyo)*., 1988, **41**, 488–493.
- 144 W. M. Maiese, M. P. Lechevalier, H. A. Lechevalier, J. Korshalla, J. Goodman, M. J. Wildey, N. Kuck and M. Greenstein, *J. Antibiot. (Tokyo)*., 1989, **42**, 846–851.
- 145 O. Ando, M. Nakajima, K. Hamano, K. Itoi, S. Takahashi, Y. Takamatsu, A. Sato, R. Enokita, T. OKAZAKI and H. HARUYAMA, *J. Antibiot. (Tokyo)*., 1993, **46**, 1116–1125.
- 146 H. Reimann and R. Jaret, *Chem. Ind.*, 1967, **52**, 2173.
- 147 L. M. C. Hernandez, J. A. D. E. L. A. F. Blanco, J. P. Baz, J. L. F. Puentes, F. R. Millan, F. E. Vazquez, R. I. Fernandez-Chimeno and D. G. Gravalos, *J. Antibiot. (Tokyo)*., 2000, **53**, 895–902.
- 148 M.-T. Gutierrez-Lugo, G. M. Woldemichael, M. P. Singh, P. A. Suarez, W. M. Maiese, G. Montenegro and B. N. Timmermann, *Nat. Prod. Res.*, 2005, **19**, 645–652.
- 149 Z. Huang, J. Tang, H. Gao, Y. Li, K. Hong, J. Li and X. Yao, *Chin J Mar Drugs*, 2011, **30**, 29–33.
- 150 S. Nakanishi, S. Chiba, H. Yano, I. Kawamoto and Y. Matsuda, *J. Antibiot. (Tokyo)*., 1995, **48**, 948–951.
- 151 A. L. Stefanska, N. J. Coates, L. M. Mensah, A. J. Pope, S. J. Ready and S. R. Warr, *J. Antibiot. (Tokyo)*., 2000, **53**, 345–350.
- 152 H. He, W.-D. Ding, V. S. Bernan, A. D. Richardson, C. M. Ireland, M. Greenstein, G. A. Ellestad and G. T. Carter, *J. Am. Chem. Soc.*, 2001, **123**, 5362–5363.
- 153 S.-W. Yang, T.-M. Chan, J. Terracciano, D. Loenbenberg, G. Chen, M. Patel, V. Gullo, B. Pramanik and M. Chu, *J. Antibiot. (Tokyo)*., 2004, **57**, 345–347.
- 154 R. D. Charan, G. Schlingmann, J. Janso, V. Bernan, X. Feng and G. T. Carter, *J. Nat. Prod.*, 2004, **67**, 1431–1433.
- 155 M. J. Weinstein, G. M. Luedemann, E. M. Oden and G. H. Wagman, *Antimicrob. Agents Chemother.*, 1967, **7**, 435.
- 156 Google Patents, U.S. Patent 4,013,789., 1977.
- 157 A. K. Ganguly, Y. T. Liu, O. Z. Sarre and S. Szmulewicz, *J. Antibiot. (Tokyo)*., 1977, **30**, 625–627.
- 158 H. Huang, X. Wu, S. Yi, Z. Zhou, J. Zhu, Z. Fang, J. Yue and S. Bao, *Antonie Van Leeuwenhoek*, 2009, **95**, 143.
- 159 K. Kyeremeh, K. S. Acquah, A. Sazak, W. Houssen, J. Tabudravu, H. Deng and M. Jaspars, *Mar. Drugs*, 2014, **12**, 999–1012.
- 160 C. J. Schulze, M. S. Donia, J. L. Siqueira-Neto, D. Ray, J. A. Raskatov, R. E. Green, J. H. McKerrow, M. A. Fischbach and R. G. Linington, *ACS Chem. Biol.*, 2015, **10**, 2373–2381.
- 161 Y.-L. Nie, Y.-D. Wu, C.-X. Wang, R. Lin, Y. Xie, D.-S. Fang, H. Jiang and Y.-Y. Lian, *Nat. Prod. Res.*, 2018, **32**, 2133–2138.
- 162 J. Wang, W. Li, H. Wang and C. Lu, *Org. Lett.*, 2018, **20**, 1058–1061.
- 163 D. E. Williams, D. S. Dalisay, J. Chen, E. A. Polishchuck, B. O. Patrick, G. Narula, M. Ko, Y. Av-Gay, H. Li and N. Magarvey, *Org. Lett.*, 2017, **19**, 766–769.
- 164 J. A. Marquez, A. N. N. C. Horan, M. Kalyanpur, B. K. Lee, D. Loebenberg, G. H. Miller, M. Patel and J. A. Waitz, *J.*

- Antibiot. (Tokyo)*, 1983, **36**, 1101–1108.
- 165 T. Sugawara, A. Tanaka, H. Imai, K. Naga and K. Suzuki, *J. Antibiot. (Tokyo)*, 1997, **50**, 944–948.
- 166 F. Annang, I. Pérez-Victoria, G. Pérez-Moreno, E. Domingo, I. González, J. R. Tormo, J. Martín, L. M. Ruiz-Pérez, O. Genilloud and D. González-Pacanowska, *J. Nat. Prod.*, 2018, **81**, 1687–1691.
- 167 K. Kinoshita, S. Takenaka and M. Hayashi, *J. Chem. Soc. Perkin Trans. 1*, 1991, 2547–2553.
- 168 K. Kinoshita, S. Takenaka, H. Suzuki, T. Yamamoto, T. Morohoshi and M. Hayashi, *J. Chem. Soc. Chem. Commun.*, 1992, 957–959.
- 169 W. Schroeder and H. Hoeksema, *J. Am. Chem. Soc.*, 1959, **81**, 1767–1768.
- 170 T. Shomura, N. Nishizawa, M. Iwata, J. Yoshida, M. Ito, S. Amano, M. Koyama, M. Kojima and S. Inouye, *J. Antibiot. (Tokyo)*, 1983, **36**, 1300–1304.
- 171 N. Nishizawa, Y. Kondo, M. Koyama, S. Omoto, M. Iwata, T. Tsuruoka and S. Inouye, *J. Antibiot. (Tokyo)*, 1984, **37**, 1–5.
- 172 B. S. Kim, S. S. Moon and B. K. Hwang, *J. Agric. Food Chem.*, 1999, **47**, 3372–3380.
- 173 Y. Igarashi, H. Ogura, K. Furihata, N. Oku, C. Indananda and A. Thamchaipenet, *J. Nat. Prod.*, 2011, **74**, 670–674.
- 174 S. Sato, F. Iwata, T. Fukae and M. Katayama, *J. Antibiot. (Tokyo)*, 2014, **67**, 479.
- 175 T. Kawahara, M. Itoh, M. Izumikawa, I. Kozone, N. Sakata, T. Tsuchida and K. Shin-ya, *J. Antibiot. (Tokyo)*, 2014, **67**, 261.
- 176 W.-H. Yeo, B.-S. Yun, S.-S. Kim, E.-K. Park, Y.-H. Kim, I.-D. Yoo and S.-H. Yu, *J. Antibiot. (Tokyo)*, 1998, **51**, 952–953.
- 177 M.-Y. Gao, H. Qi, J.-S. Li, H. Zhang, J. Zhang, J.-D. Wang and W.-S. Xiang, *J. Asian Nat. Prod. Res.*, 2017, **19**, 930–934.
- 178 S. Mhamdi, N. Ktari, S. Hajji, M. Nasri and A. S. Kamoun, *Int. J. Biol. Macromol.*, 2017, **94**, 415–422.
- 179 M. Y. Gao, H. Qi, J. S. Li, H. Zhang, J. Zhang, J. D. Wang and W. S. Xiang, *J. Asian Nat. Prod. Res.*, 2017, **19**, 930–934.
- 180 B. Ohlendorf, D. Schulz, P. Beese, A. Erhard, R. Schmaljohann and J. F. Imhoff, *Zeitschrift für Naturforsch. C*, 2012, **67**, 445–450.
- 181 L. A. Lucher, Y.-M. Chen and J. B. Walker, *Antimicrob. Agents Chemother.*, 1989, **33**, 452–459.
- 182 Google Patents, U.S. Patent 4,842,857, 1989.
- 183 M. Uyeda, K. Suzuki and M. Shibata, *Agric. Biol. Chem.*, 1984, **48**, 29–35.
- 184 Y. Zhang, N. Adnani, D. R. Braun, G. A. Ellis, K. J. Barns, S. Parker-Nance, I. A. Guzei and T. S. Bugni, *J. Nat. Prod.*, 2016, **79**, 2968–2972.
- 185 R.-J. Wang, S.-Y. Zhang, Y.-H. Ye, Z. Yu, H. Qi, H. Zhang, Z.-L. Xue, J.-D. Wang and M. Wu, *Mar. Drugs*, 2019, **17**, 294.

- 186 M. S Hifnawy, H. M. Hassan, R. Mohammed, M. M Fouda, A. M. Sayed, A. A Hamed, S. F AbouZid, M. E. Rateb, H. A. Alhadrami and U. R. Abdelmohsen, *Mar. Drugs*, 2020, **18**, 243.
- 187 A. Sarmiento-Vizcaíno, A. F. Braña, I. Pérez-Victoria, J. Martín, N. De Pedro, M. D. la Cruz, C. Díaz, F. Vicente, J. L. Acuña and F. Reyes, *Mar. Drugs*, 2017, **15**, 271.
